# Supplementary material
Source: publisher site journal article supplement (https://www.degruyterbrill.com/publication/isbn/9783110475340/downloadAsset/9783110475340_Beilage4_Excel.xlsx)
Supplement: Supplementary file 2 [file 9783110475340_Beilage4_Excel.xlsx]

## Sheet: Beilage 4 - Männer
			Tierkopfschnalle	Ortband1	Terra-Nigra	Kamm1	Spatha1	Axt1	Keramikkrug1	Mundblech1	Spatha(Scheidenniet1)	Glasschale1	Schild1.1	Gürtel2.2	Durchzug1	Ortband2	Mundblech2	Spatha(Goldgriff)	Sax(Zubehör1)	Lanze(Schlitztülle1.1)	Ortband3	Durchzug2	Lanze(Schlitztülle1.2)	Spatha(Scheidenniet2)	Kamm2.2	Durchzug3	Lanze(Schlitztülle2.1)	Schnalle1.1	Schild1.2	Schildniet1	Gürtel1.3	Gürtel1.1	Gürtel1.2	Axt3	Schwertanhänger	Gürtelbeschlag(Cloisonné)	Kamm2.3	Taschenbügel1	Schmalsax1	Riemenzunge1M	Axt2	Gürtel2.1	Gürtel1.4	Mundblech3	Gürtel2.3	Axt5	Taschenbügel2	Keramiktopf3	Taschenbügel4
	Phase 1	Wenigumstadt 141	●	●	●	●
		Hockenheim 2	●		●	●
		Mainz-Kostheim	●				●	●
		Mainz-Greiffenklaustraße 1				●		●
	Phase 2	Hemmingen 21	●	●			●			●			●							●
		Groß-Umstadt 1951						●	●			●
		Möhringen 3								●	●			●
		Hammelburg 1895					●	●									●												●
		Gültlingen 1901									●	●	●	●		●	●	●	●											●
		Entringen 1927				●								●	●		●	●			●		●						●
		Hemmingen 25				●					●	●			●														●						●
		Pleidelsheim 1/1964							●				●										●							●
		Unterschneidheim 2					●										●						●						●	●
		Kahl/Main 213			●				●																																●
		Basel-Kleinhüningen 212A												●			●				●	●	●	●					●	●
		Heilbronn-Böckingen, Klammenäcker																		●									●
		Basel-Gotterbarmweg 19									●				●	●	●						●						●	●		●						●
		Baden-Oos 1876															●	●			●		●						●					●
		Pleidelsheim 103					●																											●
		Entringen 1904																●									●		●	●
		Wyhl 22								●																			●	●		●
		Neresheim 45								●												●																●
		Horb-Altheim 52										●				●	●				●						●	●	●						●				●
		Hemmingen 29						●																	●													●
		Basel-Kleinhüningen 63															●	●	●	●	●	●		●					●	●					●	●			●
		Hemmingen 2												●			●				●	●		●		●								●			●			●
		Basel-Kleinhüningen 105																					●									●
		Pleidelsheim 71																●	●		●			●	●	●	●		●	●		●							●					●
		Gültlingen 1889															●	●			●			●		●		●							●								●
		Pleidelsheim 91																										●				●
		Blumenfeld 1885																		●	●								●				●						●
		Heidenheim-Großkuchen, Gassenäcker 21																									●		●	●					●
		Pleidelsheim 42						●																							●					●			●
		Stuttgart-Stammheim 7																									●									●
		Fridingen/Donau 259																									●		●					●	●
		Basel-Gotterbarmweg 34																		●													●						●
		Hemmingen 32											●																												●
		Aldingen 2																										●			●			●				●
		Eschborn 11																														●		●
		Hemmingen 15																														●							●
		Basel-Kleinhüningen 67																														●							●
		Basel-Gotterbarmweg 32																														●						●
		Pleidelsheim 14																														●								●
		Lenting 1955																														●						●			●
		Pleidelsheim 74																																			●					●
		Bittenbrunn 19																																				●				●
	Phase 3	Pleidelsheim 27																																			●	●				●			●
		Eschborn 9																																					●				●
		Opfingen 91/1																					●															●					●
		Pleidelsheim 83																																							●	●
		Altenerding 106																															●				●										●
		Horb-Altheim 66																														●							●
		Aldingen 7																																●					●				●						●
		Horb-Altheim 37																											●			●														●
		Weingarten 238																																●					●
		Mengen 40																											●	●
		Fristingen 5																																								●			●
		Pliening 151																																		●							●
		Fridingen/Donau 24																																					●								●
		Horb-Altheim 60																																		●			●				●			●
		Heidenheim-Großkuchen, Gassenäcker 17																																									●
		Pleidelsheim 104																																								●					●	●
		Fridingen/Donau 257																																						●									●
		Schleitheim-Hebsack 119																																				●
		Hailfingen 227																											●
		Wiesbaden-Biebrich																												●																		●
		Weingarten 681																																				●
		Weingarten 654																																													●
		Weingarten 419																																													●
		Eberfingen 5																																													●
		Mengen 30																																							●
		Pleidelsheim 116																																●
		Horb-Altheim 31																																															●
		Weingarten 510																																															●
		Pleidelsheim 40																																											●
		Altenerding 492																																													●
		Hailfingen 411																																	●
		Bittenbrunn 29																																							●						●
		Unterthürheim 214																																					●
		Pleidelsheim 113																																															●
		Lampertheim-Hofheim 1
		Pleidelsheim 111
		Altenerding P42
		Eberfingen 6																																													●
		Bittenbrunn 13																																													●	●
	Phase 4	Eberfingen 7
		Eberfingen 4																																															●
		Mainz-Bretzenheim
		Klengen 10																																	●
		Herbolzheim 19																																												●
		Altenerding 92																																										●
		Mengen 23
		Lampertheim-Hofheim 3
		Basel-Kleinhüningen 195																																													●
		Pleidelsheim 120																																															●
		Fridingen/Donau 136
		Barbing-Irlmauth 33
		Barbing-Irlmauth 34
		Altenerding 469
		Schretzheim 245
		Hailfingen 269
		Pleidelsheim 46
		Bittenbrunn 25																																									●
		Altenerding 1284
		Bittenbrunn 16
		Westheim X
		Pleidelsheim 102																																												●
		Bittenbrunn 41
		Fellbach-Schmiden 14
		Fellbach-Schmiden 7
		Bülach 32
		Weingarten 423
		Basel-Bernerring 30
		Pleidelsheim 44
		Pleidelsheim 60
		Wittislingen 4
		Schretzheim 246
		Basel-Bernerring 9
		Basel-Bernerring 5
		Schretzheim 391
		Pleidelsheim 15
		Schretzheim 370
		Pleidelsheim 95
		Pleidelsheim 127
		Kelheim 42
		Wiesbaden, Mainz-Kastel
		Bopfingen 1
		Barbing-Irlmauth 36
		Herbolzheim 11
		Barbing-Irlmauth 35
		Schretzheim 25
		Schretzheim 74
		Altenerding 674
		Schretzheim 486
		Klepsau 24
		Pleidelsheim 125
		Westheim IX
		Schretzheim 371
		Schretzheim 215
		Pleidelsheim 13
		Pleidelsheim 76
		Klepsau 13
		Sontheim/Brenz 11
		Pleidelsheim 231
		Heidenheim-Großkuchen, Pfaffensteig 6
		Kirchheim/Teck 134
		Schretzheim 214
		Pleidelsheim 244
	Phase 5	Fellbach-Schmiden 5
		Basel-Bernerring 25
		Hailfingen 424
		Pleidelsheim 68
		Schwanfeld
		Sontheim/Brenz 72
		Schretzheim 301
		Hailfingen 447
		Klepsau 9
		Hockenheim 22
		Basel-Bernerring 3
		Klepsau 51
		Klepsau 6
		Heilbronn-Horkheim 39
		Pleidelsheim 232
		Mindelheim 54
		Klepsau 8
		Marktoberdorf 85
		Fridingen/Donau 52
		Niedernberg 19
		Schretzheim 41
		Kirchheim/Ries 389
		Niederstotzingen 9
		Weingarten 619
		Niederstotzingen 12a
		Schretzheim 127
		Heidelberg-Kirchheim, Heuau 83
		Schretzheim 482
		Marktoberdorf 67
		Weingarten 616
		Viernheim 11
		Heidelberg-Kirchheim, Heuau 138
		Kirchheim/Ries 411
		Schretzheim 580
		Niedernberg 7
		Kirchheim/Ries 363
		Wallerstädten 4
		Bargen 4
		Kirchheim/Ries 414
		Fridingen/Donau 244
		Altenerding P40
		Esslingen-Sirnau 5
		Marktoberdorf 69
		Pleidelsheim 64
	Phase 6	Altenerding 724
		Schretzheim 556
		Altenerding 706
		Altenerding 712
		Pleidelsheim 78
		Marktoberdorf 187
		Eichstetten 268
		Marktoberdorf 66
		Weingarten 595
		Schretzheim 155
		Weingarten 385
		Altenerding 705
		Altenerding 1063
		Altenerding 409
		Eichstetten 207
		Schretzheim 535
		Giengen 32
		Eichstetten 91
		Eichstetten 272
		Altenerding 704
		Eichstetten 185
		Eichstetten 219
		Eichstetten 201
		Weingarten 136
		Eichstetten 134
		Eichstetten 127
		Weingarten 61
		Giengen 29
		Marktoberdorf 97
		Altenerding 575
		Schretzheim 3
		Kirchheim/Ries 118
		Altenerding 1033
		Weingarten 62
		Schretzheim 394
		Marktoberdorf 131
		Eichstetten 266
		Eichstetten 215
		Donzdorf 66
		Marktoberdorf 20
		Marktoberdorf 34
		Donzdorf 80
		Marktoberdorf 190
	Phase 7	Kirchheim/Ries 226
		Eichstetten 179
		Schretzheim 324
		Marktoberdorf 191
		Weingarten 12
		Schretzheim 274
		Eichstetten 214
		Eichstetten 169
		Giengen 26
		Eichstetten 46
		Donzdorf 48
		Altenerding 932
		Aubing 581
		Weingarten 132
		Weingarten 478
		Marktoberdorf 22
		Donzdorf 75
		Altenerding 527
		Altenerding 888
		Schretzheim 630
		Eichstetten 220
		Wettelsheim 1
		Hintschingen 14
		Donzdorf 65
		Weingarten 495A
		Schretzheim 622
		Schretzheim 378
		Schretzheim 414
		Marktoberdorf 214
		Weingarten 789B
		Schretzheim 623
		Giengen 35
		Schretzheim 621
		Marktoberdorf 197
		Marktoberdorf 183
		Giengen 2
		Marktoberdorf 141
		Schretzheim 616
		Schretzheim 345
		Giengen 9
		Marktoberdorf 209
		Marktoberdorf 196
		Donzdorf 36
		Giengen 10
		Fridingen/Donau 11
		Schretzheim 613
		Weingarten 11
		Aubing 340
		Ergolding 244B
	Phase 8	Eltville 7
		Kirchheim/Ries 324
		Egling 1924
		Weingarten 362
		Kirchheim/Ries 42
		Kirchheim/Ries 190
		Kirchheim/Ries 74
		Kirchheim/Ries 54
		Marktoberdorf 221
		Geiselhöring 2/1904
		Kirchheim/Ries 39
		Kirchheim/Ries 50
		Wiesloch 28
		Nassenfels 5
		Mauern 1(1902)
		Kirchheim/Ries 3
		Kirchheim/Ries 168
		Enns
		Eltville 546
		Eltville 111
		Bissingen 10
		Aubing 82
			Tierkopfschnalle	Ortband1	Terra-Nigra	Kamm1	Spatha1	Axt1	Keramikkrug1	Mundblech1	Spatha(Scheidenniet1)	Glasschale1	Schild1.1	Gürtel2.2	Durchzug1	Ortband2	Mundblech2	Spatha(Goldgriff)	Sax(Zubehör1)	Lanze(Schlitztülle1.1)	Ortband3	Durchzug2	Lanze(Schlitztülle1.2)	Spatha(Scheidenniet2)	Kamm2.2	Durchzug3	Lanze(Schlitztülle2.1)	Schnalle1.1	Schild1.2	Schildniet1	Gürtel1.3	Gürtel1.1	Gürtel1.2	Axt3	Schwertanhänger	Gürtelbeschlag(Cloisonné)	Kamm2.3	Taschenbügel1	Schmalsax1	Riemenzunge1M	Axt2	Gürtel2.1	Gürtel1.4	Mundblech3	Gürtel2.3	Axt5	Taschenbügel2	Keramiktopf3	Taschenbügel4
[truncated: 106 more columns]

## Sheet: CAPCA Seriation output (Männer)
Matrix of seriated data
	Gürtel2.10	Klappmesser	Langsax	Lanze(Ganztülle2.6)	Schild8	Schnalle1.6	Sporn3	Sporn2	Wabenplattierung	Schild6	Gürtel(vielteilig2B)	Spathaknauf1.3	Sporn1	Gürtel(vielteilig1B)	Saxniet4	Breitsax(schwer)	Gürtel1.10b	Gürtel1.12c	Pyramidenknopf3	Lanze(Ganztülle1.3b)	Gürtel(vielteilig1A)	Pyramidenknopf4	Gürtel1.12b	Spathagurt1.2	Spathagurt2	Taschenbügel8	Spathaknauf1.2	Pyramidenknopf2	Sax(Zubehör2)	Saxniet3	Schild7	Gürtel(vielteilig2A)	Gürtel1.12a	Saxniet2	Spathaknauf2.2	Ösenbeschlag1	Saxniet(klein)	Spathaknauf1.5	Gürtel1.11b	Lanze(Ganztülle1.3a)	Gürtel1.11a	Gürtel1.11c	Gürtel(vielteilig3)	Spathagurt1.1	Gürtel1.10a	Spathaknauf1.4	Breitsax(leicht)	Schild5b	Taschenbügel7
Aubing 82	1		1
Bissingen 10			1		1
Eltville 111		1			1
Eltville 546	1			1	1
Enns			1	1	1
Kirchheim/Ries 168	1		1
Kirchheim/Ries 3	1		1
Mauern 1(1902)		1	1		1
Nassenfels 5			1		1
Wiesloch 28			1		1
Kirchheim/Ries 50	1		1	1	1		1
Kirchheim/Ries 39			1			1	1
Geiselhöring 2/1904			1	1	1			1
Marktoberdorf 221	1		1					1
Kirchheim/Ries 54			1			1		1
Kirchheim/Ries 74	1					1		1
Kirchheim/Ries 190	1		1	1						1
Kirchheim/Ries 42			1				1			1
Weingarten 362		1							1
Egling 1924				1			1									1																							0
Kirchheim/Ries 324	1		1				1			1																											1
Eltville 7					1											1																		1			1
Ergolding 244B								1	1	1						1
Aubing 340								1			1														1
Weingarten 11									1	1	1
Schretzheim 613								1								1							1
Fridingen/Donau 11									1				1						1
Giengen 10									1																			1
Donzdorf 36								1		1				1		1						1			1
Marktoberdorf 196								1								1			1					1						1
Marktoberdorf 209								1								1				1	1									1
Giengen 9										1				1		1			1
Schretzheim 345												1	1			1
Schretzheim 616										1	1					1				1
Marktoberdorf 141								1		1						1										1	1																	1
Giengen 2														1		1
Marktoberdorf 183												1			1	1					1
Marktoberdorf 197										1			1		1	1				1				1
Schretzheim 621														1		1
Giengen 35														1		1				1
Schretzheim 623																1		1		1
Weingarten 789B										1						1				1													1
Marktoberdorf 214										1	1		1						1	1										1					1
Schretzheim 414													1	1		1												1
Schretzheim 378																	1				1
Schretzheim 622										1						1		1		1								1							1
Weingarten 495A										1						1						1			1				1
Donzdorf 65										1	1					1			1										1	1							1
Hintschingen 14										1			1			1		1		1				1														1
Wettelsheim 1										1	1					1						1												1			1
Eichstetten 220																1	1																	1
Schretzheim 630										1				1		1				1								1	1								1
Altenerding 888																1					1									1
Altenerding 527																1																1
Donzdorf 75											1		1			1			1	1				1													1	1
Marktoberdorf 22																1										1						1
Weingarten 478										1									1	1				1										1		1	1
Weingarten 132																1		1																1		1
Aubing 581																1						1			1		1					1		1
Altenerding 932														1																				1			1
Donzdorf 48										1						1				1					1		1							1			1					1
Eichstetten 46															1																		1				1
Giengen 26											1		1			1			1					1						1	1						1									1
Eichstetten 169																1				1						1					1								1
Eichstetten 214																1																	1	1			1
Schretzheim 274																1						1			1									1		1			1
Weingarten 12																1			1																	1			1
Marktoberdorf 191																1										1										1			1
Schretzheim 324																1					1													1										1
Eichstetten 179										1						1											1									1					1			1
Kirchheim/Ries 226										1				1																				1			1										1
Marktoberdorf 190																1																							1
Donzdorf 80										1												1	1		1
Marktoberdorf 34																										1										1					1
Marktoberdorf 20										1																													1					1
Donzdorf 66																1																		1				1		1		1
Eichstetten 215																1														1			1				1												1
Eichstetten 266																							1						1	1																	1
Marktoberdorf 131										1									1						1
Schretzheim 394																						1			1						1				1					1							1
Weingarten 62																1				1							1														1							1
Altenerding 1033																														1		1					1										1
Kirchheim/Ries 118										1						1																		1	1									1
Schretzheim 3																									1			1								1					1						1
Altenerding 575																																1												1
Marktoberdorf 97																1																		1	1				1					1				1
Giengen 29																				1																							1	1
Weingarten 61																														1						1	1					1					1
Eichstetten 127																														1				1					1								1
Eichstetten 134																																	1	1													1
Weingarten 136																																		1			1		1								1
Eichstetten 201																1																				1					1								1
Eichstetten 219																														1							1				1						1
Eichstetten 185																																		1			1					1					1
Altenerding 704																					1																										1
Eichstetten 272																													1										1								1
Eichstetten 91																																		1			1								1		1
Giengen 32																																											1	1
Schretzheim 535																																												1		1
Eichstetten 207																																					1				1			1			1
Altenerding 409																								1																			1
Altenerding 1063																																													1		1
Altenerding 705																																													1		1
Weingarten 385																												1													1			1			1
Schretzheim 155																																								1				1			1
Weingarten 595																																							1					1
Marktoberdorf 66																																							1					1			1
Eichstetten 268																																					1										1
Marktoberdorf 187																																							1					1			1
Pleidelsheim 78																																																	1
Altenerding 712																																						1									1
Altenerding 706																																									1
Schretzheim 556																																														1
Altenerding 724																																										1		1
Pleidelsheim 64																																															1
Marktoberdorf 69																																															1
Esslingen-Sirnau 5
Altenerding P40
Fridingen/Donau 244																																															1		1
Kirchheim/Ries 414																																															1
Bargen 4																																															1		1
Wallerstädten 4																																															1
Kirchheim/Ries 363
Niedernberg 7																																															1
Schretzheim 580
Kirchheim/Ries 411
Heidelberg-Kirchheim, Heuau 138
Viernheim 11																																															1
Weingarten 616
Marktoberdorf 67
Schretzheim 482
Heidelberg-Kirchheim, Heuau 83
Schretzheim 127																																																1
Niederstotzingen 12a
Weingarten 619
Niederstotzingen 9
Kirchheim/Ries 389
Schretzheim 41
Niedernberg 19
Fridingen/Donau 52
Marktoberdorf 85
Klepsau 8
Mindelheim 54
Pleidelsheim 232
Heilbronn-Horkheim 39
Klepsau 6
Klepsau 51
Basel-Bernerring 3
Hockenheim 22
Klepsau 9
Hailfingen 447
Schretzheim 301
Sontheim/Brenz 72
Schwanfeld
Pleidelsheim 68
Hailfingen 424
Basel-Bernerring 25
Fellbach-Schmiden 5
Pleidelsheim 244
Schretzheim 214
Kirchheim/Teck 134
Heidenheim-Großkuchen, Pfaffensteig 6
Pleidelsheim 231
Sontheim/Brenz 11
Klepsau 13
Pleidelsheim 76
Pleidelsheim 13
Schretzheim 215
Schretzheim 371
Westheim IX
Pleidelsheim 125
Klepsau 24
Schretzheim 486
Altenerding 674
Schretzheim 74
Schretzheim 25																																					1
Barbing-Irlmauth 35
Herbolzheim 11
Barbing-Irlmauth 36
Bopfingen 1
Wiesbaden, Mainz-Kastel
Kelheim 42
Pleidelsheim 127
Pleidelsheim 95
Schretzheim 370
Pleidelsheim 15
Schretzheim 391
Basel-Bernerring 5
Basel-Bernerring 9
Schretzheim 246
Wittislingen 4
Pleidelsheim 60
Pleidelsheim 44
Basel-Bernerring 30
Weingarten 423
Bülach 32
Fellbach-Schmiden 7
Fellbach-Schmiden 14
Bittenbrunn 41
Pleidelsheim 102
Westheim X
Bittenbrunn 16
Altenerding 1284
Bittenbrunn 25
Pleidelsheim 46
Hailfingen 269
Schretzheim 245
Altenerding 469
Barbing-Irlmauth 34
Barbing-Irlmauth 33
Fridingen/Donau 136
Pleidelsheim 120
Basel-Kleinhüningen 195
Lampertheim-Hofheim 3
Mengen 23
Altenerding 92
Herbolzheim 19
Klengen 10
Mainz-Bretzenheim
Eberfingen 4
Eberfingen 7
Bittenbrunn 13
Eberfingen 6
Altenerding P42
Pleidelsheim 111
Lampertheim-Hofheim 1
Pleidelsheim 113
Unterthürheim 214
Bittenbrunn 29
Hailfingen 411
Altenerding 492
Pleidelsheim 40
Weingarten 510
Horb-Altheim 31
Pleidelsheim 116
Mengen 30
Eberfingen 5
Weingarten 419
Weingarten 654
Weingarten 681
Wiesbaden-Biebrich
Hailfingen 227
Schleitheim-Hebsack 119
Fridingen/Donau 257
Pleidelsheim 104
Heidenheim-Großkuchen, Gassenäcker 17
Horb-Altheim 60
Fridingen/Donau 24
Pliening 151
Fristingen 5
Mengen 40
Weingarten 238
Horb-Altheim 37
Aldingen 7
Horb-Altheim 66
Altenerding 106
Pleidelsheim 83
Opfingen 91/1
Eschborn 9
Pleidelsheim 27
Bittenbrunn 19
Pleidelsheim 74
Lenting 1955
Pleidelsheim 14
Basel-Gotterbarmweg 32
Basel-Kleinhüningen 67
Hemmingen 15
Eschborn 11
Aldingen 2
Hemmingen 32
Basel-Gotterbarmweg 34
Fridingen/Donau 259
Stuttgart-Stammheim 7
Pleidelsheim 42
Heidenheim-Großkuchen, Gassenäcker 21
Blumenfeld 1885
Pleidelsheim 91
Gültlingen 1889
Pleidelsheim 71
Basel-Kleinhüningen 105
Hemmingen 2
Basel-Kleinhüningen 63
Hemmingen 29
Horb-Altheim 52
Neresheim 45
Wyhl 22
Entringen 1904
Pleidelsheim 103
Baden-Oos 1876
Basel-Gotterbarmweg 19
Heilbronn-Böckingen, Klammenäcker
Basel-Kleinhüningen 212A
Kahl/Main 213
Unterschneidheim 2
Pleidelsheim 1/1964
Hemmingen 25
Entringen 1927
Gültlingen 1901
Hammelburg 1895
Möhringen 3
Groß-Umstadt 1951
Hemmingen 21
Mainz-Greiffenklaustraße 1
Mainz-Kostheim
Hockenheim 2
Wenigumstadt 141
	-1.57975	-1.57975	-1.57975	-1.57975	-1.57975	-1.56486	-1.52766	-1.34907	-1.29327	-1.19653	-1.17793	-1.17793	-1.17049	-1.16305	-1.15933	-1.15561	-1.15561	-1.15561	-1.15561	-1.14816	-1.137	-1.137	-1.13328	-1.12956	-1.12956	-1.12956	-1.12584	-1.11468	-1.11468	-1.11096	-1.11096	-1.10724	-1.10724	-1.10352	-1.10352	-1.09608	-1.08492	-1.04399	-1.02911	-1.00679	-0.999344	-0.999344	-0.980742	-0.973301	-0.943536	-0.939816	-0.884008	-0.869126	-0.820759
The trendline used as basis for seriation of objects is: 1,3504X^2 0,0267X + -1,3594
With a Pearson R^2 of 0,9806 for goodness of fit.
The trendline used as basis for seriation of variables is: 1,3619X^2 + 0,0426X + -1,3653
With a Pearson R^2 of 0,9837 for goodness of fit.
[truncated: 104 more columns]

## Sheet: CAPCA Statistics (Männer)
Analysis completed after 114 iterations
No objects were excluded
No variables were excluded
Total Inertia of data
	1. Principal axis	2. Principal axis	3. Principal axis
Eigen values	0.972546	0.909745	0.864869
Variable coordinates	2.55628	2.39121	2.27326
Cumulative explanation %	1. Principal axis	2. Principal axis	3. Principal axis
Ango	0.739767	-0.761256	0.652636
Axt1	1.4742	1.72542	-0.722614
Axt2	1.13901	0.532284	-0.0232278
Axt3	1.25433	0.902747	-0.209838
Axt4	0.884712	-0.400256	0.51818
Axt5	0.879178	-0.266528	0.377079
Axt6	0.389796	-1.21487	0.557273
Axt7	0.484581	-1.3259	0.759621
Breitsax(leicht)	-0.802538	-0.308716	-0.74859
Breitsax(schwer)	-1.19268	0.398074	-0.809464
Durchzug1	1.4476	1.60605	-0.632974
Durchzug2	1.41278	1.43003	-0.496001
Durchzug3	1.38503	1.33329	-0.441883
Glasschale1	1.45663	1.65348	-0.670808
Gürtel(vielteilig1A)	-1.17957	0.328673	-1.03245
Gürtel(vielteilig1B)	-1.20782	0.412675	-0.888524
Gürtel(vielteilig2A)	-1.14124	0.249228	-1.04661
Gürtel(vielteilig2B)	-1.22069	0.466307	-0.746988
Gürtel(vielteilig3)	-0.958773	-0.0853818	-0.996718
Gürtel(Zellenmuster)	-0.418884	-0.921476	-0.375209
Gürtel1.1	1.31767	1.05973	-0.268241
Gürtel1.10a	-0.927646	-0.184494	-0.980367
Gürtel1.10b	-1.22399	0.384008	-1.20508
Gürtel1.11a	-0.97729	-0.0438233	-0.916181
Gürtel1.11b	-0.99397	0.0453344	-0.919535
Gürtel1.11c	-0.949765	-0.0319903	-0.825715
Gürtel1.12a	-1.13281	0.251906	-0.956628
Gürtel1.12b	-1.13682	0.334657	-0.571912
Gürtel1.12c	-1.20877	0.392058	-1.01077
Schnalle1.6	-1.55457	1.9064	3.48911
Gürtel1.2	1.31433	1.01362	-0.219309
Gürtel1.3	1.35586	1.20436	-0.357137
Gürtel1.4	1.08415	0.310279	0.111747
Gürtel1.5	0.450676	-1.11175	0.605427
Gürtel1.6	0.349729	-1.32472	0.586439
Gürtel1.7	-0.267533	-1.07778	-0.147074
Gürtel1.8	0.0262916	-1.36652	0.256408
Gürtel1.9	-0.184182	-1.14712	-0.041433
Gürtel2.1	1.19936	0.453065	0.214925
Gürtel2.10	-1.56367	1.9801	3.79046
Gürtel2.2	1.45617	1.61722	-0.62422
Gürtel2.3	1.10267	0.120768	0.395925
Gürtel2.4	0.732018	-0.672	0.542184
Gürtel2.5	0.856399	-0.470757	0.536101
Gürtel2.6	0.665427	-0.870681	0.644586
Gürtel2.7	0.596217	-1.03956	0.683447
Gürtel2.8	0.266134	-1.37352	0.534665
Gürtel2.9	0.274645	-1.31031	0.51348
Gürtelbeschlag1	0.448977	-1.17677	0.592983
Gürtelbeschlag2	0.0228561	-1.28636	0.229996
Hefteln1	0.551188	-0.991225	0.621173
Hefteln2	0.658962	-0.934787	0.694732
Kamm1	1.52663	1.98207	-0.91733
Kamm2.2	1.3941	1.36963	-0.468004
Kamm2.3	1.28	0.791194	-0.0144095
Kamm4	0.240833	-1.19472	0.410163
Keramikkrug1	1.45652	1.68155	-0.710467
Keramiktopf1	0.537754	-1.08063	0.677071
Keramiktopf2	0.211725	-1.46235	0.499586
Keramiktopf3	0.904398	-0.349477	0.518808
Klappmesser	-1.57975	2.00987	3.7615
Kurzsax2	0.469223	-1.08227	0.592426
Kurzsax1	0.733059	-0.763362	0.65404
Langsax	-1.5741	2.02489	3.92245
Lanze(Ganztülle1.1)	-0.280836	-1.09783	-0.183171
Lanze(Ganztülle1.2)	-0.443825	-0.843979	-0.432234
Lanze(Ganztülle1.3a)	-0.989857	-0.0157274	-0.950291
Lanze(Ganztülle1.3b)	-1.1901	0.370493	-0.937405
Lanze(Ganztülle2.1)	0.342868	-1.1486	0.524624
Lanze(Ganztülle2.2)	0.690036	-0.788788	0.619418
Lanze(Ganztülle2.3)	0.225168	-1.29317	0.443128
Lanze(Ganztülle2.4)	0.166333	-1.32574	0.39032
Lanze(Ganztülle2.5)	-0.419328	-0.891673	-0.370701
Lanze(Ganztülle2.6)	-1.56193	1.96564	3.73672
Lanze(Schlitztülle1.1)	1.41827	1.47579	-0.544709
Lanze(Schlitztülle1.2)	1.40382	1.41711	-0.504596
Lanze(Schlitztülle1.3)	0.896896	-0.450484	0.606511
Lanze(Schlitztülle1.4)	0.506306	-1.07003	0.600633
Lanze(Schlitztülle1.5)	0.566464	-1.08151	0.651481
Lanze(Schlitztülle1.6)	0.152622	-1.37702	0.410107
Lanze(Schlitztülle2.1)	1.37386	1.31381	-0.447235
Lanze(Schlitztülle2.2)	0.72791	-0.7752	0.636517
Lanze(Schlitztülle2.3)	0.089183	-1.41832	0.349536
Mundblech1	1.46349	1.65793	-0.659721
Mundblech2	1.42833	1.51434	-0.564617
Mundblech3	1.03624	0.289377	0.058599
Nadel(Bronze)	0.624748	-0.952786	0.661344
Gürtelbeschlag(Cloisonné)	1.25472	0.868349	-0.185566
Ortband1	1.55829	2.12408	-1.02038
Ortband2	1.43089	1.52551	-0.572358
Ortband3	1.40715	1.42574	-0.505184
Ösenbeschlag1	-1.12275	0.217427	-1.01041
Pinzette1	0.815191	-0.572319	0.590936
Pyramidenknopf1	-0.53357	-0.691315	-0.47342
Pyramidenknopf2	-1.13266	0.27011	-0.842773
Pyramidenknopf3	-1.19028	0.39321	-0.837993
Pyramidenknopf4	-1.16361	0.333285	-0.845441
Riemenzunge1M	1.23192	0.716838	-0.0511089
Sax(Zubehör1)	1.41423	1.46407	-0.535867
Sax(Zubehör2)	-1.13648	0.268571	-0.900116
Saxniet(klein)	-1.05504	0.206422	-0.647657
Saxniet1	-0.555233	-0.667733	-0.51181
Saxniet2	-1.12025	0.244104	-0.882397
Saxniet3	-1.13239	0.262031	-0.889502
Saxniet4	-1.21309	0.397677	-1.05135
Schild1.1	1.44491	1.6184	-0.656761
Schild1.2	1.35434	1.26093	-0.428265
Schild2	0.402048	-1.0645	0.520942
Schild3.1	0.476993	-0.782113	0.443614
Schild3.2	-0.0165062	-1.26721	0.180417
Schild4	-0.0881181	-1.19069	0.0773253
Schild5a	-0.401419	-0.856696	-0.341144
Schild5b	-0.741548	-0.319718	-0.601523
Schild6	-1.21588	0.527241	-0.375982
Schild7	-1.14216	0.254822	-1.02874
Schild8	-1.57635	2.04676	4.01526
Schildniet1	1.34698	1.23843	-0.414291
Schildniet2	0.536944	-1.07212	0.648071
Schildniet3	-0.0150904	-1.18924	0.150542
Schmalsax2	0.0882288	-1.3282	0.301448
Schmalsax1	1.22736	0.780793	-0.137089
Schnalle1.1	1.37828	1.29811	-0.415835
Schnalle2.1	0.510871	-1.04056	0.573503
Schwertanhänger	1.22309	0.881699	-0.248763
Spatha(Goldgriff)	1.41703	1.47466	-0.54242
Spatha(Scheidenniet1)	1.46056	1.65372	-0.65988
Spatha(Scheidenniet2)	1.39849	1.38883	-0.479226
Spatha1	1.47998	1.76019	-0.749768
Spatha2	-0.526729	-0.768584	-0.501557
Spathagurt1.1	-0.917228	-0.0905282	-0.841506
Spathagurt1.2	-1.15179	0.311194	-0.887515
Spathagurt2	-1.15008	0.319946	-0.784125
Spathaknauf1.1	-0.507323	-0.629736	-0.284849
Spathaknauf1.2	-1.15064	0.303149	-0.867864
Spathaknauf1.3	-1.24869	0.450925	-1.14051
Spathaknauf1.4	-0.895001	-0.182254	-0.855984
Spathaknauf1.5	-0.990593	0.095188	-0.843968
Spathaknauf2.1	0.223778	-1.13964	0.384811
Spathaknauf2.2	-1.12169	0.236656	-0.940127
Sporn1	-1.21945	0.429992	-0.942842
Sporn2	-1.36051	1.0579	0.979955
Sporn3	-1.50988	1.74647	3.0976
Taschenbügel1	1.24879	0.781244	-0.0849092
Taschenbügel2	0.917364	-0.349719	0.529301
Taschenbügel3	0.744558	-0.802913	0.722276
Taschenbügel4	0.900172	-0.413598	0.556096
Taschenbügel5	0.411428	-1.20598	0.58161
Taschenbügel6	0.685045	-0.754014	0.535457
Taschenbügel7	-0.728435	-0.441361	-0.671884
Taschenbügel8	-1.16835	0.312121	-0.987844
Terra-Nigra	1.52725	2.02699	-0.976494
Tierkopfschnalle	1.56152	2.14078	-1.03391
Wabenplattierung	-1.32857	0.851624	0.182614
Object coordinates
	1. Principal axis	2. Principal axis	3. Principal axis
Aldingen 2	1.32763	1.09738	-0.286903
Aldingen 7	1.13214	0.414224	0.0863203
Altenerding 1033	-1.04728	0.107241	-0.8958
Altenerding 106	1.18695	0.508557	0.106014
Altenerding 1063	-0.877209	-0.258491	-0.929596
Altenerding 1284	0.659032	-0.917514	0.68802
Altenerding 409	-0.849056	-0.220433	-0.797667
Altenerding 469	0.666368	-0.875617	0.643956
Altenerding 492	0.836268	-0.535626	0.576029
Altenerding 527	-1.18333	0.339379	-0.997867
Altenerding 575	-1.04366	0.0832532	-1.01513
Altenerding 674	0.400583	-1.22688	0.576796
Altenerding 704	-1.00494	0.0105174	-0.957562
Altenerding 705	-0.877209	-0.258491	-0.929596
Altenerding 706	-0.616006	-0.609626	-0.605661
Altenerding 712	-0.493382	-0.509977	-0.425718
Altenerding 724	-0.453618	-0.705198	-0.367331
Altenerding 888	-1.1846	0.345606	-0.978976
Altenerding 92	0.685728	-0.705979	0.521983
Altenerding 932	-1.14352	0.301711	-0.866853
Altenerding P40	-0.448716	-0.841491	-0.358962
Altenerding P42	0.817633	-0.616222	0.620758
Aubing 340	-1.26122	0.644459	-0.197477
Aubing 581	-1.16926	0.322927	-0.938312
Aubing 82	-1.59095	2.09901	4.14703
Baden-Oos 1876	1.39676	1.39723	-0.493571
Barbing-Irlmauth 33	0.703776	-0.869171	0.705371
Barbing-Irlmauth 34	0.637994	-0.85929	0.632201
Barbing-Irlmauth 35	0.377718	-1.16018	0.562015
Barbing-Irlmauth 36	0.440465	-1.15251	0.6052
Bargen 4	-0.413488	-0.867302	-0.335564
Basel-Bernerring 25	0.24363	-1.2992	0.450515
Basel-Bernerring 3	0.132684	-1.31865	0.356717
Basel-Bernerring 30	0.608882	-1.02948	0.689232
Basel-Bernerring 5	0.513936	-1.02284	0.602202
Basel-Bernerring 9	0.546707	-1.03851	0.656685
Basel-Gotterbarmweg 19	1.40143	1.40466	-0.493301
Basel-Gotterbarmweg 32	1.30118	0.965138	-0.189757
Basel-Gotterbarmweg 34	1.33845	1.14294	-0.322857
Basel-Kleinhüningen 105	1.37977	1.29849	-0.415369
Basel-Kleinhüningen 195	0.726697	-0.814663	0.680029
Basel-Kleinhüningen 212A	1.42059	1.48005	-0.539689
Basel-Kleinhüningen 63	1.37756	1.32843	-0.455241
Basel-Kleinhüningen 67	1.29032	0.964903	-0.217815
Bissingen 10	-1.59738	2.13394	4.26789
Bittenbrunn 13	0.786951	-0.633408	0.608238
Bittenbrunn 16	0.632008	-0.909015	0.648697
Bittenbrunn 19	1.24121	0.647086	0.0699898
Bittenbrunn 25	0.59049	-0.854216	0.513969
Bittenbrunn 29	0.754516	-0.527233	0.458
Bittenbrunn 41	0.635696	-0.941584	0.669022
Blumenfeld 1885	1.36309	1.24917	-0.394399
Bopfingen 1	0.516043	-1.14518	0.650761
Bülach 32	0.608523	-0.974412	0.676788
Donzdorf 36	-1.23215	0.532799	-0.488043
Donzdorf 48	-1.14388	0.306368	-0.823985
Donzdorf 65	-1.17967	0.377747	-0.799923
Donzdorf 66	-1.06333	0.14466	-0.927275
Donzdorf 75	-1.16748	0.350073	-0.894306
Donzdorf 80	-1.04925	0.185675	-0.615539
Eberfingen 4	0.796899	-0.680031	0.651411
Eberfingen 5	0.913681	-0.393169	0.563142
Eberfingen 6	0.810552	-0.626546	0.632507
Eberfingen 7	0.778899	-0.670592	0.627997
Egling 1924	-1.44147	1.43614	2.15964
Eichstetten 127	-1.02648	0.0636793	-0.924747
Eichstetten 134	-1.03281	0.0655066	-0.927469
Eichstetten 169	-1.15341	0.289599	-1.00708
Eichstetten 179	-1.11145	0.229219	-0.864039
Eichstetten 185	-0.995663	0.0288286	-0.834517
Eichstetten 201	-1.01938	0.0342083	-0.916124
Eichstetten 207	-0.873535	-0.189592	-0.78837
Eichstetten 214	-1.14098	0.288495	-0.886042
Eichstetten 215	-1.06297	0.142016	-0.854866
Eichstetten 219	-1.00572	0.0304281	-0.860746
Eichstetten 220	-1.19551	0.358685	-1.0383
Eichstetten 266	-1.06681	0.145916	-0.836052
Eichstetten 268	-0.718286	-0.412381	-0.553222
Eichstetten 272	-0.991365	0.00186638	-0.920533
Eichstetten 46	-1.14955	0.299204	-0.951822
Eichstetten 91	-0.990055	-0.0111394	-0.876096
Eltville 111	-1.60024	2.12607	4.18136
Eltville 546	-1.58936	2.09377	4.13737
Eltville 7	-1.25343	0.758804	0.450561
Enns	-1.59288	2.10942	4.18469
Entringen 1904	1.39225	1.38609	-0.49239
Entringen 1927	1.45012	1.61184	-0.634196
Eschborn 11	1.30399	1.02884	-0.256921
Eschborn 9	1.17193	0.572004	-0.0135583
Esslingen-Sirnau 5	-0.500094	-0.821793	-0.482431
Fellbach-Schmiden 14	0.620301	-0.948391	0.641307
Fellbach-Schmiden 5	0.166491	-1.16451	0.327973
Fellbach-Schmiden 7	0.606371	-0.940777	0.596124
Fridingen/Donau 136	0.676219	-0.826737	0.597324
Fridingen/Donau 24	1.08738	0.225997	0.210904
Fridingen/Donau 244	-0.445183	-0.83269	-0.381622
Fridingen/Donau 257	0.971433	-0.175443	0.433898
Fridingen/Donau 259	1.31961	1.14266	-0.358512
Fridingen/Donau 52	0.069059	-1.38618	0.317329
Fridingen/Donau 11	-1.26358	0.585321	-0.57278
Fristingen 5	1.16714	0.300825	0.328479
Geiselhöring 2/1904	-1.53957	1.85931	3.40198
Giengen 10	-1.24788	0.588018	-0.354862
Giengen 2	-1.21709	0.425051	-0.912862
Giengen 26	-1.14917	0.295913	-0.913563
Giengen 29	-1.03636	0.0680606	-0.994858
Giengen 32	-0.951144	-0.0921537	-0.988321
Giengen 35	-1.21366	0.412864	-0.944552
Giengen 9	-1.21852	0.453792	-0.782745
Groß-Umstadt 1951	1.48289	1.76864	-0.753913
Gültlingen 1889	1.35893	1.26174	-0.414679
Gültlingen 1901	1.44838	1.60303	-0.626032
Hailfingen 227	0.874169	-0.241577	0.31102
Hailfingen 269	0.650679	-0.888756	0.643013
Hailfingen 411	0.730508	-0.50562	0.405797
Hailfingen 424	0.197921	-1.28546	0.414126
Hailfingen 447	0.14275	-1.27248	0.331321
Hammelburg 1895	1.45426	1.64115	-0.662545
Heidelberg-Kirchheim, Heuau 138	-0.208531	-1.12705	-0.0639624
Heidelberg-Kirchheim, Heuau 83	-0.138016	-1.22552	0.019151
Heidenheim-Großkuchen, Gassenäcker 17	0.99823	-0.0471623	0.33868
Heidenheim-Großkuchen, Gassenäcker 21	1.34309	1.23066	-0.413465
Heidenheim-Großkuchen, Pfaffensteig 6	0.289999	-1.26942	0.503776
Heilbronn-Böckingen, Klammenäcker	1.40569	1.43474	-0.52296
Heilbronn-Horkheim 39	0.120481	-1.3908	0.36404
Hemmingen 15	1.29032	0.964903	-0.217815
Hemmingen 2	1.38062	1.29552	-0.404462
Hemmingen 21	1.50853	1.88333	-0.835888
Hemmingen 25	1.4312	1.5794	-0.637484
Hemmingen 29	1.39155	1.35478	-0.457039
Hemmingen 32	1.31003	1.12751	-0.365471
Herbolzheim 11	0.507632	-1.22992	0.722647
Herbolzheim 19	0.683334	-0.670785	0.525132
Hintschingen 14	-1.18341	0.378113	-0.892127
Hockenheim 2	1.55995	2.1494	-1.04917
Hockenheim 22	0.134996	-1.3291	0.367205
Horb-Altheim 31	0.904965	-0.426657	0.577543
Horb-Altheim 37	1.10688	0.388431	0.0730349
Horb-Altheim 52	1.38351	1.35775	-0.476583
Horb-Altheim 60	1.04047	0.196896	0.150916
Horb-Altheim 66	1.15925	0.503382	0.0405097
Kahl/Main 213	1.39347	1.48219	-0.61283
Kelheim 42	0.483371	-1.11086	0.632951
Kirchheim/Ries 226	-1.09546	0.226856	-0.761955
Kirchheim/Ries 118	-1.03114	0.109114	-0.774713
Kirchheim/Ries 168	-1.59095	2.09901	4.14703
Kirchheim/Ries 190	-1.49968	1.70279	2.97703
Kirchheim/Ries 3	-1.59095	2.09901	4.14703
Kirchheim/Ries 324	-1.40316	1.35958	2.10489
Kirchheim/Ries 363	-0.365667	-1.00191	-0.288179
Kirchheim/Ries 389	-0.0198554	-1.27147	0.170631
Kirchheim/Ries 39	-1.56793	1.98381	3.767
Kirchheim/Ries 411	-0.224403	-1.13244	-0.107846
Kirchheim/Ries 414	-0.468085	-0.857053	-0.425636
Kirchheim/Ries 42	-1.45343	1.50197	2.38159
Kirchheim/Ries 50	-1.57908	2.04689	3.99223
Kirchheim/Ries 54	-1.51743	1.74325	3.00795
Kirchheim/Ries 74	-1.5139	1.7276	2.96064
Kirchheim/Teck 134	0.32245	-1.32731	0.555053
Klengen 10	0.705019	-0.666547	0.500839
Klepsau 13	0.296409	-1.22269	0.475776
Klepsau 24	0.35718	-1.18604	0.531635
Klepsau 51	0.191714	-1.48679	0.495816
Klepsau 6	0.0933581	-1.29375	0.289393
Klepsau 8	0.0654727	-1.31043	0.277302
Klepsau 9	0.165834	-1.39233	0.414451
Lampertheim-Hofheim 1	0.823645	-0.608913	0.629426
Lampertheim-Hofheim 3	0.744151	-0.805474	0.693026
Lenting 1955	1.25244	0.829462	-0.134809
Mainz-Bretzenheim	0.781933	-0.683796	0.631536
Mainz-Greiffenklaustraße 1	1.52138	1.94367	-0.881508
Mainz-Kostheim	1.52626	1.96644	-0.898128
Marktoberdorf 131	-1.03014	0.16008	-0.613688
Marktoberdorf 141	-1.18393	0.438242	-0.520156
Marktoberdorf 183	-1.22546	0.412971	-1.08432
Marktoberdorf 187	-0.731643	-0.433579	-0.71627
Marktoberdorf 190	-1.10866	0.232491	-0.929558
Marktoberdorf 191	-1.13514	0.255075	-1.00194
Marktoberdorf 196	-1.22244	0.50795	-0.525653
Marktoberdorf 197	-1.21396	0.425473	-0.896839
Marktoberdorf 20	-1.05698	0.168499	-0.765952
Marktoberdorf 209	-1.22804	0.506857	-0.578201
Marktoberdorf 214	-1.20097	0.402327	-0.871064
Marktoberdorf 22	-1.1838	0.335352	-1.0193
Marktoberdorf 221	-1.52051	1.769	3.11597
Marktoberdorf 34	-1.10474	0.16981	-1.0446
Marktoberdorf 66	-0.738572	-0.414966	-0.720995
Marktoberdorf 67	-0.145418	-1.13415	-0.00190484
Marktoberdorf 69	-0.520954	-0.785696	-0.502729
Marktoberdorf 85	0.0152157	-1.11143	0.22309
Marktoberdorf 97	-1.02878	0.089851	-0.895086
Mauern 1(1902)	-1.5989	2.12487	4.19357
Mengen 23	0.743535	-0.771841	0.656328
Mengen 30	0.8436	-0.381814	0.423017
Mengen 40	1.08641	0.328561	0.0887672
Mindelheim 54	0.114568	-1.41858	0.381424
Möhringen 3	1.48048	1.72265	-0.69654
Nassenfels 5	-1.59738	2.13394	4.26789
Neresheim 45	1.39425	1.3523	-0.44453
Niedernberg 19	0.0339269	-1.30111	0.238755
Niedernberg 7	-0.327449	-0.980013	-0.225872
Niederstotzingen 12a	-0.0387677	-1.21032	0.121872
Niederstotzingen 9	-0.0232701	-1.24491	0.153192
Opfingen 91/1	1.17154	0.552667	0.0109325
Pleidelsheim 1/1964	1.43281	1.5611	-0.614394
Pleidelsheim 102	0.637422	-0.931144	0.653409
Pleidelsheim 103	1.38627	1.39606	-0.515779
Pleidelsheim 104	1.02116	-0.0860225	0.452717
Pleidelsheim 111	0.817633	-0.616222	0.620758
Pleidelsheim 113	0.828082	-0.617013	0.650566
Pleidelsheim 116	0.79967	-0.375221	0.405143
Pleidelsheim 120	0.687809	-0.82709	0.642619
Pleidelsheim 125	0.448135	-1.29931	0.689681
Pleidelsheim 127	0.508871	-1.13271	0.657732
Pleidelsheim 13	0.372876	-1.28741	0.60583
Pleidelsheim 14	1.29263	0.931373	-0.171589
Pleidelsheim 15	0.514772	-1.10391	0.631109
Pleidelsheim 231	0.324707	-1.31022	0.562665
Pleidelsheim 232	0.13158	-1.47094	0.412225
Pleidelsheim 244	0.311233	-1.32466	0.548529
Pleidelsheim 27	1.22461	0.562589	0.137592
Pleidelsheim 40	0.870524	-0.5176	0.638614
Pleidelsheim 42	1.34661	1.20026	-0.376868
Pleidelsheim 44	0.577349	-1.01283	0.645942
Pleidelsheim 46	0.69428	-0.920412	0.743805
Pleidelsheim 60	0.569857	-1.02896	0.66592
Pleidelsheim 64	-0.500249	-0.76315	-0.424843
Pleidelsheim 68	0.232868	-1.38521	0.491202
Pleidelsheim 71	1.3581	1.25815	-0.412873
Pleidelsheim 74	1.25703	0.652298	0.107899
Pleidelsheim 76	0.385958	-1.32668	0.627846
Pleidelsheim 78	-0.650811	-0.581367	-0.636477
Pleidelsheim 83	1.18556	0.516571	0.103135
Pleidelsheim 91	1.36682	1.23611	-0.367652
Pleidelsheim 95	0.49081	-1.10175	0.583714
Pliening 151	1.08958	0.27205	0.159308
Schleitheim-Hebsack 119	0.942488	-0.226721	0.431683
Schretzheim 127	-0.0999289	-1.1534	0.105365
Schretzheim 155	-0.78865	-0.333268	-0.774659
Schretzheim 214	0.308814	-1.32218	0.569372
Schretzheim 215	0.347532	-1.24768	0.562911
Schretzheim 245	0.636381	-0.876352	0.629479
Schretzheim 246	0.557004	-1.03772	0.657382
Schretzheim 25	0.143786	-0.942818	0.359387
Schretzheim 274	-1.13965	0.272322	-0.941089
Schretzheim 3	-1.0516	0.0954465	-0.925183
Schretzheim 301	0.0543946	-1.07178	0.201363
Schretzheim 324	-1.11789	0.230791	-0.958541
Schretzheim 345	-1.23739	0.447033	-1.03682
Schretzheim 370	0.435753	-1.05301	0.559274
Schretzheim 371	0.422178	-1.28701	0.637579
Schretzheim 378	-1.21864	0.37367	-1.20294
Schretzheim 391	0.483655	-1.0764	0.59551
Schretzheim 394	-1.07654	0.143384	-0.949339
Schretzheim 41	0.0238653	-1.23333	0.204373
Schretzheim 414	-1.20482	0.396052	-0.936421
Schretzheim 482	-0.155488	-1.22451	-0.0104685
Schretzheim 486	0.392464	-1.22114	0.598881
Schretzheim 535	-0.91881	-0.142942	-0.912662
Schretzheim 556	-0.579909	-0.674676	-0.562038
Schretzheim 580	-0.259375	-1.00042	-0.198624
Schretzheim 613	-1.24727	0.62575	-0.143809
Schretzheim 616	-1.22174	0.461893	-0.77142
Schretzheim 621	-1.21709	0.425051	-0.912862
Schretzheim 622	-1.19347	0.383528	-0.881066
Schretzheim 623	-1.21398	0.405663	-0.988368
Schretzheim 630	-1.17782	0.367525	-0.829759
Schretzheim 74	0.330026	-1.14366	0.467499
Schwanfeld	0.178237	-1.29072	0.380012
Sontheim/Brenz 11	0.324707	-1.31022	0.562665
Sontheim/Brenz 72	0.150718	-1.25355	0.332038
Stuttgart-Stammheim 7	1.33267	1.14401	-0.340097
Unterschneidheim 2	1.4223	1.50797	-0.572223
Unterthürheim 214	0.730535	-0.560332	0.419359
Viernheim 11	-0.14786	-1.06805	0.00207798
Wallerstädten 4	-0.368339	-0.910037	-0.259682
Weingarten 11	-1.27266	0.64483	-0.336976
Weingarten 12	-1.1407	0.276325	-0.96165
Weingarten 132	-1.1774	0.328124	-0.998106
Weingarten 136	-1.00687	0.0490981	-0.859735
Weingarten 238	1.08624	0.353546	0.070028
Weingarten 362	-1.47459	1.49977	2.12069
Weingarten 385	-0.826416	-0.285278	-0.774964
Weingarten 419	0.913681	-0.393169	0.563142
Weingarten 423	0.569891	-0.995932	0.613786
Weingarten 478	-1.16556	0.340045	-0.857018
Weingarten 495A	-1.18819	0.387348	-0.79892
Weingarten 510	0.892783	-0.448965	0.577169
Weingarten 595	-0.484759	-0.289097	-0.472235
Weingarten 61	-1.02669	0.0724263	-0.886431
Weingarten 616	-0.120632	-1.0869	0.0345818
Weingarten 619	-0.026667	-1.20672	0.131971
Weingarten 62	-1.06518	0.148541	-0.888694
Weingarten 654	0.913681	-0.393169	0.563142
Weingarten 681	0.898473	-0.341614	0.489291
Weingarten 789B	-1.19946	0.405703	-0.827783
Wenigumstadt 141	1.56498	2.16883	-1.06113
Westheim IX	0.356403	-1.21105	0.542066
Westheim X	0.591639	-0.890419	0.569697
Wettelsheim 1	-1.17765	0.380163	-0.771999
Wiesbaden, Mainz-Kastel	0.504994	-1.13721	0.664452
Wiesbaden-Biebrich	0.867582	-0.280368	0.386279
Wiesloch 28	-1.59738	2.13394	4.26789
Wittislingen 4	0.538048	-1.01251	0.617148
Wyhl 22	1.38978	1.36752	-0.475807
Ergolding 244B	-1.2923	0.742983	-0.00606451
Quality of fit in plots - variables
	Mass %	Inertia %	Relative contributions could not be calculated
Ango	0.578991	0.826508
Axt1	0.496278	0.863102
Axt2	0.496278	0.972621
Axt3	0.744417	0.743005
Axt4	1.81969	0.88009
Axt5	0.330852	0.599913
Axt6	0.413565	0.532341
Axt7	0.165426	0.871798
Breitsax(leicht)	2.5641	0.602634
Breitsax(schwer)	3.97022	0.540326
Durchzug1	0.248139	0.34637
Durchzug2	0.330852	0.420251
Durchzug3	0.248139	0.273358
Glasschale1	0.330852	0.465883
Gürtel(vielteilig1A)	0.496278	0.877705
Gürtel(vielteilig1B)	0.744417	0.762012
Gürtel(vielteilig2A)	0.413565	0.909084
Gürtel(vielteilig2B)	0.661704	0.50999
Gürtel(vielteilig3)	0.248139	1.01565
Gürtel(Zellenmuster)	0.413565	0.563632
Gürtel1.1	1.07527	0.954594
Gürtel1.10a	0.248139	1.08866
Gürtel1.10b	0.165426	1.09084
Gürtel1.11a	0.744417	0.593736
Gürtel1.11b	1.07527	0.659175
Gürtel1.11c	0.413565	0.484152
Gürtel1.12a	0.413565	0.70757
Gürtel1.12b	0.248139	0.679793
Gürtel1.12c	0.330852	0.578009
Schnalle1.6	0.248139	0.869624
Gürtel1.2	0.248139	0.752805
Gürtel1.3	0.165426	0.652762
Gürtel1.4	0.661704	0.746498
Gürtel1.5	0.661704	0.659274
Gürtel1.6	0.248139	1.16167
Gürtel1.7	0.992556	0.627892
Gürtel1.8	0.248139	0.752805
Gürtel1.9	0.248139	0.979143
Gürtel2.1	0.496278	1.11864
Gürtel2.10	0.744417	0.900387
Gürtel2.2	0.413565	0.412601
Gürtel2.3	0.248139	0.825817
Gürtel2.4	0.82713	0.725487
Gürtel2.5	0.496278	0.658668
Gürtel2.6	1.57155	0.594064
Gürtel2.7	0.248139	0.629727
Gürtel2.8	0.909843	0.880109
Gürtel2.9	0.248139	0.635985
Gürtelbeschlag1	0.330852	0.976969
Gürtelbeschlag2	0.496278	0.545499
Hefteln1	0.330852	0.692221
Hefteln2	0.82713	0.519593
Kamm1	0.413565	0.711951
Kamm2.2	0.165426	0.543243
Kamm2.3	0.330852	0.776185
Kamm4	1.73697	0.544105
Keramikkrug1	0.248139	0.796612
Keramiktopf1	0.165426	0.324207
Keramiktopf2	0.413565	0.795185
Keramiktopf3	0.248139	0.60678
Klappmesser	0.248139	1.16167
Kurzsax2	2.06782	0.606638
Kurzsax1	0.992556	0.684216
Langsax	1.32341	0.934452
Lanze(Ganztülle1.1)	0.496278	0.575225
Lanze(Ganztülle1.2)	0.165426	0.76228
Lanze(Ganztülle1.3a)	0.248139	0.533768
Lanze(Ganztülle1.3b)	1.32341	0.499899
Lanze(Ganztülle2.1)	1.07527	0.65749
Lanze(Ganztülle2.2)	0.248139	0.629727
Lanze(Ganztülle2.3)	0.661704	0.741413
Lanze(Ganztülle2.4)	0.248139	0.796612
Lanze(Ganztülle2.5)	0.661704	0.560708
Lanze(Ganztülle2.6)	0.496278	0.73168
Lanze(Schlitztülle1.1)	0.413565	0.663763
Lanze(Schlitztülle1.2)	0.661704	0.550277
Lanze(Schlitztülle1.3)	0.165426	0.587051
Lanze(Schlitztülle1.4)	0.661704	0.552885
Lanze(Schlitztülle1.5)	0.496278	0.863102
Lanze(Schlitztülle1.6)	0.496278	0.768186
Lanze(Schlitztülle2.1)	0.496278	0.619728
Lanze(Schlitztülle2.2)	1.24069	0.805569
Lanze(Schlitztülle2.3)	0.661704	0.664359
Mundblech1	0.330852	0.703173
Mundblech2	0.909843	0.339155
Mundblech3	0.165426	0.368014
Nadel(Bronze)	0.82713	0.655708
Gürtelbeschlag(Cloisonné)	0.413565	0.70757
Ortband1	0.165426	0.543243
Ortband2	0.248139	0.285527
Ortband3	0.744417	0.310611
Ösenbeschlag1	0.82713	0.559019
Pinzette1	0.744417	0.657013
Pyramidenknopf1	0.744417	0.550624
Pyramidenknopf2	0.496278	0.611732
Pyramidenknopf3	0.82713	0.490284
Pyramidenknopf4	0.578991	0.447888
Riemenzunge1M	0.248139	0.747937
Sax(Zubehör1)	0.248139	0.236852
Sax(Zubehör2)	0.413565	0.551115
Saxniet(klein)	1.9024	0.506885
Saxniet1	0.496278	0.695174
Saxniet2	1.65426	0.548074
Saxniet3	0.992556	0.528109
Saxniet4	0.248139	0.650588
Schild1.1	0.330852	0.666667
Schild1.2	1.57155	0.5059
Schild2	1.48883	0.620758
Schild3.1	0.661704	0.588087
Schild3.2	1.07527	0.623792
Schild4	0.82713	0.738629
Schild5a	1.24069	0.594042
Schild5b	0.248139	0.489961
Schild6	2.15054	0.479873
Schild7	0.248139	0.412081
Schild8	0.82713	0.950782
Schildniet1	0.992556	0.447882
Schildniet2	0.82713	0.517402
Schildniet3	1.40612	0.460935
Schmalsax2	1.07527	0.600204
Schmalsax1	1.24069	0.743266
Schnalle1.1	0.330852	0.639287
Schnalle2.1	1.07527	0.598519
Schwertanhänger	0.661704	0.427069
Spatha(Goldgriff)	0.578991	0.339412
Spatha(Scheidenniet1)	0.330852	0.465883
Spatha(Scheidenniet2)	0.413565	0.266576
Spatha1	0.413565	0.751377
Spatha2	0.661704	0.527852
Spathagurt1.1	1.40612	0.669112
Spathagurt1.2	0.578991	0.443566
Spathagurt2	0.82713	0.497376
Spathaknauf1.1	0.496278	0.585656
Spathaknauf1.2	0.413565	0.422822
Spathaknauf1.3	0.165426	0.76228
Spathaknauf1.4	0.248139	0.82095
Spathaknauf1.5	0.330852	0.463015
Spathaknauf2.1	0.578991	0.535949
Spathaknauf2.2	0.413565	0.414687
Sporn1	0.661704	0.50999
Sporn2	0.909843	0.669038
Sporn3	0.413565	0.725093
Taschenbügel1	0.909843	0.77922
Taschenbügel2	0.909843	0.971706
Taschenbügel3	0.248139	0.825817
Taschenbügel4	0.578991	0.892219
Taschenbügel5	1.07527	0.632698
Taschenbügel6	0.496278	0.636764
Taschenbügel7	0.413565	0.651246
Taschenbügel8	0.413565	0.663763
Terra-Nigra	0.248139	0.796612
Tierkopfschnalle	0.330852	0.703173
Wabenplattierung	0.413565	0.996698
Quality of fit in plots - objects
	Mass*100	Inertia %	Relative contributions could not be calculated
Aldingen 2	0.330852	0.616886
Aldingen 7	0.330852	0.284135
Altenerding 1033	0.330852	0.227252
Altenerding 106	0.248139	0.584213
Altenerding 1063	0.165426	0.476119
Altenerding 1284	0.248139	0.33164
Altenerding 409	0.248139	0.4691
Altenerding 469	0.248139	0.263623
Altenerding 492	0.165426	0.246548
Altenerding 527	0.165426	0.285875
Altenerding 575	0.165426	0.335803
Altenerding 674	0.248139	0.389429
Altenerding 704	0.165426	0.257083
Altenerding 705	0.165426	0.476119
Altenerding 706	0.248139	0.58731
Altenerding 712	0.330852	0.322803
Altenerding 724	0.496278	0.310162
Altenerding 888	0.248139	0.230768
Altenerding 92	0.413565	0.441356
Altenerding 932	0.248139	0.172728
Altenerding P40	0.248139	0.373141
Altenerding P42	0.165426	0.143004
Aubing 340	0.248139	0.27026
Aubing 581	0.496278	0.299604
Aubing 82	0.165426	0.223815
Baden-Oos 1876	0.496278	0.264528
Barbing-Irlmauth 33	0.248139	0.446154
Barbing-Irlmauth 34	0.330852	0.431985
Barbing-Irlmauth 35	0.165426	0.169758
Barbing-Irlmauth 36	0.496278	0.203002
Bargen 4	0.578991	0.251578
Basel-Bernerring 25	0.496278	0.281842
Basel-Bernerring 3	0.165426	0.565147
Basel-Bernerring 30	0.330852	0.251665
Basel-Bernerring 5	0.661704	0.372894
Basel-Bernerring 9	0.661704	0.342229
Basel-Gotterbarmweg 19	0.744417	0.399924
Basel-Gotterbarmweg 32	0.165426	0.21622
Basel-Gotterbarmweg 34	0.248139	0.519166
Basel-Kleinhüningen 105	0.165426	0.261023
Basel-Kleinhüningen 195	0.330852	0.217048
Basel-Kleinhüningen 212A	0.661704	0.348284
Basel-Kleinhüningen 63	0.992556	0.380409
Basel-Kleinhüningen 67	0.165426	0.18436
Bissingen 10	0.165426	0.209213
Bittenbrunn 13	0.496278	0.281972
Bittenbrunn 16	0.248139	0.225726
Bittenbrunn 19	0.165426	0.334163
Bittenbrunn 25	0.496278	0.284533
Bittenbrunn 29	0.330852	0.268982
Bittenbrunn 41	0.248139	0.417922
Blumenfeld 1885	0.413565	0.39062
Bopfingen 1	0.248139	0.562973
Bülach 32	0.330852	0.196906
Donzdorf 36	0.496278	0.20782
Donzdorf 48	0.661704	0.217614
Donzdorf 65	0.578991	0.214247
Donzdorf 66	0.413565	0.438155
Donzdorf 75	0.661704	0.268341
Donzdorf 80	0.413565	0.399859
Eberfingen 4	0.330852	0.304213
Eberfingen 5	0.165426	0.174864
Eberfingen 6	0.248139	0.21659
Eberfingen 7	0.413565	0.334278
Egling 1924	0.248139	0.332985
Eichstetten 127	0.330852	0.150662
Eichstetten 134	0.248139	0.240777
Eichstetten 169	0.413565	0.353741
Eichstetten 179	0.496278	0.218797
Eichstetten 185	0.330852	0.205348
Eichstetten 201	0.330852	0.275139
Eichstetten 207	0.413565	0.205891
Eichstetten 214	0.330852	0.197841
Eichstetten 215	0.413565	0.27702
Eichstetten 219	0.330852	0.168842
Eichstetten 220	0.248139	0.493611
Eichstetten 266	0.330852	0.417719
Eichstetten 268	0.248139	0.132846
Eichstetten 272	0.248139	0.264366
Eichstetten 46	0.248139	0.498849
Eichstetten 91	0.330852	0.292963
Eltville 111	0.165426	0.565147
Eltville 546	0.248139	0.324467
Eltville 7	0.330852	0.13213
Enns	0.248139	0.281876
Entringen 1904	0.330852	0.284039
Entringen 1927	0.661704	0.395221
Eschborn 11	0.165426	0.24277
Eschborn 9	0.165426	0.247544
Esslingen-Sirnau 5	0.248139	0.309864
Fellbach-Schmiden 14	0.413565	0.200923
Fellbach-Schmiden 5	0.413565	0.402187
Fellbach-Schmiden 7	0.165426	0.315782
Fridingen/Donau 136	0.165426	0.383944
Fridingen/Donau 24	0.165426	0.202741
Fridingen/Donau 244	0.496278	0.234941
Fridingen/Donau 257	0.330852	0.407094
Fridingen/Donau 259	0.330852	0.290558
Fridingen/Donau 52	0.165426	0.315782
Fridingen/Donau 11	0.248139	0.36584
Fristingen 5	0.165426	0.652762
Geiselhöring 2/1904	0.330852	0.26734
Giengen 10	0.165426	0.477532
Giengen 2	0.165426	0.169056
Giengen 26	0.744417	0.362191
Giengen 29	0.248139	0.391824
Giengen 32	0.165426	0.511032
Giengen 35	0.248139	0.16384
Giengen 9	0.330852	0.16899
Groß-Umstadt 1951	0.248139	0.650588
Gültlingen 1889	0.661704	0.435425
Gültlingen 1901	0.744417	0.545188
Hailfingen 227	0.248139	0.231728
Hailfingen 269	0.496278	0.160972
Hailfingen 411	0.413565	0.250595
Hailfingen 424	0.413565	0.381294
Hailfingen 447	0.330852	0.21319
Hammelburg 1895	0.330852	0.326566
Heidelberg-Kirchheim, Heuau 138	0.248139	0.519166
Heidelberg-Kirchheim, Heuau 83	0.165426	0.565147
Heidenheim-Großkuchen, Gassenäcker 17	0.165426	0.219667
Heidenheim-Großkuchen, Gassenäcker 21	0.330852	0.272305
Heidenheim-Großkuchen, Pfaffensteig 6	0.248139	0.436766
Heilbronn-Böckingen, Klammenäcker	0.165426	0.327665
Heilbronn-Horkheim 39	0.248139	0.436766
Hemmingen 15	0.165426	0.18436
Hemmingen 2	0.744417	0.529426
Hemmingen 21	0.496278	0.709777
Hemmingen 25	0.496278	0.517447
Hemmingen 29	0.248139	0.657225
Hemmingen 32	0.165426	0.543243
Herbolzheim 11	0.248139	0.687094
Herbolzheim 19	0.248139	0.368146
Hintschingen 14	0.578991	0.318838
Hockenheim 2	0.248139	0.679793
Hockenheim 22	0.248139	0.41069
Horb-Altheim 31	0.165426	0.243135
Horb-Altheim 37	0.330852	0.313725
Horb-Altheim 52	0.744417	0.402829
Horb-Altheim 60	0.413565	0.414061
Horb-Altheim 66	0.248139	0.159108
Kahl/Main 213	0.248139	0.7236
Kelheim 42	0.330852	0.209779
Kirchheim/Ries 226	0.413565	0.133856
Kirchheim/Ries 118	0.496278	0.196893
Kirchheim/Ries 168	0.165426	0.223815
Kirchheim/Ries 190	0.330852	0.240177
Kirchheim/Ries 3	0.165426	0.223815
Kirchheim/Ries 324	0.413565	0.228607
Kirchheim/Ries 363	0.248139	0.309864
Kirchheim/Ries 389	0.248139	0.243404
Kirchheim/Ries 39	0.248139	0.515515
Kirchheim/Ries 411	0.413565	0.257623
Kirchheim/Ries 414	0.578991	0.279556
Kirchheim/Ries 42	0.248139	0.257164
Kirchheim/Ries 50	0.413565	0.325716
Kirchheim/Ries 54	0.248139	0.419936
Kirchheim/Ries 74	0.248139	0.462526
Kirchheim/Teck 134	0.248139	0.382127
Klengen 10	0.496278	0.249736
Klepsau 13	0.496278	0.233994
Klepsau 24	0.578991	0.183387
Klepsau 51	0.248139	0.357875
Klepsau 6	0.661704	0.298747
Klepsau 8	0.248139	0.22193
Klepsau 9	0.413565	0.40485
Lampertheim-Hofheim 1	0.165426	0.243135
Lampertheim-Hofheim 3	0.165426	0.271012
Lenting 1955	0.248139	0.286548
Mainz-Bretzenheim	0.330852	0.224564
Mainz-Greiffenklaustraße 1	0.165426	0.477532
Mainz-Kostheim	0.248139	0.533768
Marktoberdorf 131	0.330852	0.257518
Marktoberdorf 141	0.496278	0.253754
Marktoberdorf 183	0.330852	0.662103
Marktoberdorf 187	0.496278	0.237
Marktoberdorf 190	0.165426	0.124125
Marktoberdorf 191	0.330852	0.252673
Marktoberdorf 196	0.413565	0.219346
Marktoberdorf 197	0.496278	0.303676
Marktoberdorf 20	0.248139	0.14611
Marktoberdorf 209	0.413565	0.212149
Marktoberdorf 214	0.578991	0.260503
Marktoberdorf 22	0.248139	0.362189
Marktoberdorf 221	0.248139	0.225236
Marktoberdorf 34	0.248139	0.353671
Marktoberdorf 66	0.413565	0.178205
Marktoberdorf 67	0.330852	0.227534
Marktoberdorf 69	0.413565	0.277693
Marktoberdorf 85	0.330852	0.233207
Marktoberdorf 97	0.496278	0.311092
Mauern 1(1902)	0.248139	0.4279
Mengen 23	0.248139	0.264666
Mengen 30	0.248139	0.314732
Mengen 40	0.330852	0.233973
Mindelheim 54	0.248139	0.250042
Möhringen 3	0.248139	0.60678
Nassenfels 5	0.165426	0.209213
Neresheim 45	0.248139	0.511201
Niedernberg 19	0.330852	0.272621
Niedernberg 7	0.496278	0.243085
Niederstotzingen 12a	0.248139	0.195826
Niederstotzingen 9	0.330852	0.252583
Opfingen 91/1	0.330852	0.245187
Pleidelsheim 1/1964	0.330852	0.511516
Pleidelsheim 102	0.578991	0.360635
Pleidelsheim 103	0.165426	0.40452
Pleidelsheim 104	0.248139	0.511201
Pleidelsheim 111	0.165426	0.143004
Pleidelsheim 113	0.165426	0.292916
Pleidelsheim 116	0.330852	0.420251
Pleidelsheim 120	0.248139	0.1998
Pleidelsheim 125	0.248139	0.869624
Pleidelsheim 127	0.248139	0.183534
Pleidelsheim 13	0.165426	0.167695
Pleidelsheim 14	0.165426	0.534819
Pleidelsheim 15	0.496278	0.268165
Pleidelsheim 231	0.248139	0.217692
Pleidelsheim 232	0.248139	0.345621
Pleidelsheim 244	0.165426	0.331508
Pleidelsheim 27	0.330852	0.543873
Pleidelsheim 40	0.413565	0.704649
Pleidelsheim 42	0.330852	0.604606
Pleidelsheim 44	0.248139	0.154329
Pleidelsheim 46	0.165426	0.565147
Pleidelsheim 60	0.248139	0.293673
Pleidelsheim 64	0.165426	0.476119
Pleidelsheim 68	0.330852	0.261653
Pleidelsheim 71	0.992556	0.536147
Pleidelsheim 74	0.165426	0.543243
Pleidelsheim 76	0.165426	0.534819
Pleidelsheim 78	0.165426	0.477532
Pleidelsheim 83	0.165426	0.433725
Pleidelsheim 91	0.165426	0.425301
Pleidelsheim 95	0.330852	0.479924
Pliening 151	0.248139	0.31805
Schleitheim-Hebsack 119	0.330852	0.234235
Schretzheim 127	0.413565	0.410949
Schretzheim 155	0.330852	0.313998
Schretzheim 214	0.165426	0.21622
Schretzheim 215	0.413565	0.21392
Schretzheim 245	0.248139	0.185615
Schretzheim 246	0.248139	0.196452
Schretzheim 25	0.496278	0.15718
Schretzheim 274	0.496278	0.20188
Schretzheim 3	0.413565	0.257249
Schretzheim 301	0.248139	0.235392
Schretzheim 324	0.330852	0.186021
Schretzheim 345	0.248139	0.559322
Schretzheim 370	0.248139	0.205438
Schretzheim 371	0.165426	0.334163
Schretzheim 378	0.165426	0.871798
Schretzheim 391	0.330852	0.168619
Schretzheim 394	0.496278	0.48714
Schretzheim 41	0.330852	0.335986
Schretzheim 414	0.330852	0.269663
Schretzheim 482	0.248139	0.27991
Schretzheim 486	0.330852	0.203805
Schretzheim 535	0.165426	0.511032
Schretzheim 556	0.248139	0.453455
Schretzheim 580	0.330852	0.526379
Schretzheim 613	0.248139	0.383429
Schretzheim 616	0.330852	0.153475
Schretzheim 621	0.165426	0.169056
Schretzheim 622	0.496278	0.310456
Schretzheim 623	0.248139	0.285527
Schretzheim 630	0.578991	0.226242
Schretzheim 74	0.578991	0.198757
Schwanfeld	0.248139	0.592178
Sontheim/Brenz 11	0.248139	0.217692
Sontheim/Brenz 72	0.413565	0.213575
Stuttgart-Stammheim 7	0.165426	0.477532
Unterschneidheim 2	0.413565	0.279243
Unterthürheim 214	0.330852	0.201916
Viernheim 11	0.496278	0.188325
Wallerstädten 4	0.496278	0.27594
Weingarten 11	0.248139	0.311923
Weingarten 12	0.330852	0.186962
Weingarten 132	0.330852	0.267838
Weingarten 136	0.330852	0.124473
Weingarten 238	0.248139	0.236852
Weingarten 362	0.165426	0.696569
Weingarten 385	0.496278	0.251977
Weingarten 419	0.165426	0.174864
Weingarten 423	0.330852	0.2282
Weingarten 478	0.578991	0.186532
Weingarten 495A	0.413565	0.253105
Weingarten 510	0.248139	0.304491
Weingarten 595	0.248139	0.22193
Weingarten 61	0.413565	0.230457
Weingarten 616	0.496278	0.286418
Weingarten 619	0.330852	0.193934
Weingarten 62	0.413565	0.371714
Weingarten 654	0.165426	0.174864
Weingarten 681	0.330852	0.46894
Weingarten 789B	0.330852	0.202758
Wenigumstadt 141	0.330852	0.834595
Westheim IX	0.248139	0.15127
Westheim X	0.248139	0.162639
Wettelsheim 1	0.496278	0.171223
Wiesbaden, Mainz-Kastel	0.248139	0.300129
Wiesbaden-Biebrich	0.413565	0.336364
Wiesloch 28	0.165426	0.209213
Wittislingen 4	0.578991	0.310036
Wyhl 22	0.330852	0.295472
Ergolding 244B	0.330852	0.221426
Relative contributions of variables to principal axes
Relative contributions could not be calculated
Relative contributions of objects to principal axes
Relative contributions could not be calculated
Absolute contributions of variables to principal axes
	1. Principal axis	2. Principal axis	3. Principal axis
Ango	0.410873	0.417744	0.25627
Axt1	1.4605	1.92091	0.281213
Axt2	0.982484	0.206009	0.000327432
Axt3	1.3653	0.679001	0.0306206
Axt4	1.96665	0.386481	0.540656
Axt5	0.240699	0.0212391	0.0354832
Axt6	0.0524817	0.489465	0.0859618
Axt7	0.0531316	0.381918	0.104629
Breitsax(leicht)	1.56142	0.221839	1.08871
Breitsax(schwer)	4.78763	0.512068	1.76727
Durchzug1	0.282572	0.333951	0.0432955
Durchzug2	0.435403	0.428314	0.0430073
Durchzug3	0.204147	0.181638	0.0166524
Glasschale1	0.513108	0.634803	0.0872055
Gürtel(vielteilig1A)	0.950862	0.0708811	0.583773
Gürtel(vielteilig1B)	1.29832	0.145521	0.563057
Gürtel(vielteilig2A)	0.76825	0.035178	0.517793
Gürtel(vielteilig2B)	0.788928	0.110535	0.23675
Gürtel(vielteilig3)	0.36347	0.00276757	0.314789
Gürtel(Zellenmuster)	0.064169	0.298152	0.0412593
Gürtel1.1	2.79607	1.73643	0.0928585
Gürtel1.10a	0.364713	0.013851	0.326438
Gürtel1.10b	0.424151	0.0400842	0.329481
Gürtel1.11a	0.662301	0.00127864	0.466454
Gürtel1.11b	1.09866	0.00219434	0.753513
Gürtel1.11c	0.283372	0.000308669	0.171642
Gürtel1.12a	0.589154	0.0279717	0.336694
Gürtel1.12b	0.342024	0.0284579	0.0693691
Gürtel1.12c	0.438387	0.044279	0.245645
Schnalle1.6	0.818179	1.18137	3.30287
Gürtel1.2	0.506273	0.289104	0.0112961
Gürtel1.3	0.311448	0.235938	0.0173166
Gürtel1.4	0.910898	0.0716351	0.00775531
Gürtel1.5	0.139014	0.812218	0.201043
Gürtel1.6	0.0553148	0.762007	0.124641
Gürtel1.7	0.069983	1.0905	0.0169491
Gürtel1.8	0.000202586	0.525458	0.0154411
Gürtel1.9	0.012931	0.481602	0.00052441
Gürtel2.1	1.2529	0.171659	0.0322423
Gürtel2.10	2.57121	3.95869	12.1078
Gürtel2.2	0.567668	0.672265	0.0835958
Gürtel2.3	0.3909	0.00450208	0.040387
Gürtel2.4	0.504483	0.408199	0.221785
Gürtel2.5	0.376135	0.109123	0.118119
Gürtel2.6	0.648575	1.06613	0.487706
Gürtel2.7	0.0871476	0.254376	0.0917683
Gürtel2.8	0.0889822	2.27564	0.287808
Gürtel2.9	0.0186761	0.408149	0.0523148
Gürtelbeschlag1	0.102226	0.674264	0.142901
Gürtelbeschlag2	0.000221883	0.6748	0.018005
Hefteln1	0.109164	0.338964	0.111106
Hefteln2	0.292791	0.565707	0.2608
Kamm1	1.07661	1.74246	0.311516
Kamm2.2	0.274021	0.253942	0.0247476
Kamm2.3	0.660109	0.242156	6.70396e-05
Kamm4	0.0860019	2.03207	0.199905
Keramikkrug1	0.657924	0.841955	0.125448
Keramiktopf1	0.0243329	0.0943439	0.0309122
Keramiktopf2	0.0231288	1.05936	0.103197
Keramiktopf3	0.193217	0.0277009	0.0509538
Klappmesser	1.12863	1.75406	5.12786
Kurzsax2	0.433313	2.2133	0.553539
Kurzsax1	0.572565	0.596127	0.365252
Langsax	4.80748	7.63806	23.9223
Lanze(Ganztülle1.1)	0.0353238	0.518278	0.0120423
Lanze(Ganztülle1.2)	0.038971	0.135304	0.0296204
Lanze(Ganztülle1.3a)	0.203607	4.93507e-05	0.150382
Lanze(Ganztülle1.3b)	1.47008	0.136793	0.730914
Lanze(Ganztülle2.1)	0.130394	1.405	0.244647
Lanze(Ganztülle2.2)	0.116732	0.146453	0.0753791
Lanze(Ganztülle2.3)	0.0390244	1.23586	0.121121
Lanze(Ganztülle2.4)	0.0085802	0.523349	0.0378634
Lanze(Ganztülle2.5)	0.102354	0.444367	0.0641038
Lanze(Ganztülle2.6)	1.38985	2.11341	6.37475
Lanze(Schlitztülle1.1)	0.866305	0.900609	0.102405
Lanze(Schlitztülle1.2)	1.12582	1.10149	0.116565
Lanze(Schlitztülle1.3)	0.122564	0.0296871	0.0449151
Lanze(Schlitztülle1.4)	0.147138	0.630993	0.165941
Lanze(Schlitztülle1.5)	0.215641	0.754708	0.228574
Lanze(Schlitztülle1.6)	0.0139324	1.08894	0.0806163
Lanze(Schlitztülle2.1)	0.910777	0.799687	0.0773454
Lanze(Schlitztülle2.2)	0.830849	0.904743	0.509125
Lanze(Schlitztülle2.3)	0.00548568	1.33212	0.0675284
Mundblech1	0.78176	0.963293	0.127307
Mundblech2	0.987693	1.06596	0.123682
Mundblech3	0.102562	0.00767936	0.000262836
Nadel(Bronze)	0.332119	0.741661	0.298247
Gürtelbeschlag(Cloisonné)	0.72278	0.332378	0.0126691
Ortband1	0.342371	0.610762	0.117642
Ortband2	0.227589	0.248373	0.0291819
Ortband3	0.718311	0.708022	0.0741938
Ösenbeschlag1	0.914465	0.0329275	0.593512
Pinzette1	0.509928	0.241322	0.214737
Pyramidenknopf1	0.183086	0.295089	0.115505
Pyramidenknopf2	0.611058	0.0333655	0.271108
Pyramidenknopf3	0.901396	0.0944495	0.358045
Pyramidenknopf4	0.550879	0.0433913	0.233047
Riemenzunge1M	0.441902	0.143659	0.000609521
Sax(Zubehör1)	0.184421	0.189768	0.0212189
Sax(Zubehör2)	0.461856	0.0247648	0.232177
Saxniet(klein)	1.68404	0.0618947	0.508555
Saxniet1	0.166866	0.231715	0.113625
Saxniet2	1.78514	0.0813809	0.887578
Saxniet3	1.05455	0.0542142	0.521445
Saxniet4	0.372724	0.0384584	0.224354
Schild1.1	0.722476	0.870246	0.119617
Schild1.2	2.28796	1.90417	0.183338
Schild2	0.234382	1.57758	0.315343
Schild3.1	0.138908	0.358571	0.0962834
Schild3.2	0.000286714	1.62249	0.0274504
Schild4	0.00744269	1.30475	0.00459283
Schild5a	0.186328	0.814828	0.107843
Schild5b	0.10489	0.0187206	0.0553091
Schild6	2.39363	0.432137	0.183419
Schild7	0.209282	0.0100019	0.136059
Schild8	3.0659	4.96272	15.9411
Schildniet1	1.26543	1.02705	0.0959324
Schildniet2	0.19358	0.741008	0.225987
Schildniet3	0.000231561	1.38081	0.0184677
Schmalsax2	0.007882	1.71503	0.0737355
Schmalsax1	2.17947	0.846858	0.0217897
Schnalle1.1	0.630378	0.536887	0.0459841
Schnalle2.1	0.263521	1.04968	0.266136
Schwertanhänger	0.663246	0.330928	0.0219873
Spatha(Goldgriff)	0.619095	0.643745	0.0726953
Spatha(Scheidenniet1)	0.515881	0.634988	0.0843871
Spatha(Scheidenniet2)	0.338286	0.320328	0.0318333
Spatha1	1.06786	1.45028	0.21963
Spatha2	0.152037	0.310806	0.110472
Spathagurt1.1	1.24187	0.011615	0.837667
Spathagurt1.2	0.534535	0.0374648	0.254342
Spathagurt2	0.853724	0.063437	0.318028
Spathaknauf1.1	0.117364	0.173626	0.0296505
Spathaknauf1.2	0.363231	0.0242071	0.165593
Spathaknauf1.3	0.308478	0.038624	0.206232
Spathaknauf1.4	0.25601	0.0101929	0.187663
Spathaknauf1.5	0.23584	0.00209085	0.137188
Spathaknauf2.1	0.0243797	0.607105	0.0577731
Spathaknauf2.2	0.338537	0.0144687	0.190578
Sporn1	0.787328	0.0939889	0.377172
Sporn2	1.76774	1.0262	0.734963
Sporn3	1.07257	1.37781	3.61762
Taschenbügel1	1.73462	0.651823	0.00642646
Taschenbügel2	1.1673	0.162881	0.311418
Taschenbügel3	0.178227	0.198997	0.134407
Taschenbügel4	0.65674	0.133116	0.200853
Taschenbügel5	0.180676	1.49046	0.289343
Taschenbügel6	0.23267	0.27064	0.113917
Taschenbügel7	0.224218	0.0790329	0.152867
Taschenbügel8	0.5879	0.0402839	0.336797
Terra-Nigra	0.723367	1.22342	0.236983
Tierkopfschnalle	0.889996	1.60608	0.312675
Wabenplattierung	1.14149	0.450332	0.0172827
Absolute contributions of objects to principal axes
	1. Principal axis	2. Principal axis	3. Principal axis
Aldingen 2	1.02948	0.67112	0.052462
Aldingen 7	0.344814	0.0440426	0.00218736
Altenerding 1033	0.235992	0.00236107	0.188408
Altenerding 106	0.584469	0.102374	0.00508779
Altenerding 1063	0.173442	0.0143699	0.212542
Altenerding 1284	0.102283	0.189161	0.121646
Altenerding 409	0.240138	0.015444	0.231281
Altenerding 469	0.0831256	0.136946	0.0847086
Altenerding 492	0.0816255	0.0319502	0.0422602
Altenerding 527	0.189505	0.0148729	0.147049
Altenerding 575	0.173156	0.00105132	0.178757
Altenerding 674	0.0443749	0.397167	0.100393
Altenerding 704	0.12291	1.2845e-05	0.121772
Altenerding 705	0.173442	0.0143699	0.212542
Altenerding 706	0.158256	0.147888	0.166939
Altenerding 712	0.0743987	0.0758431	0.0604438
Altenerding 724	0.0906409	0.209017	0.0648583
Altenerding 888	0.229954	0.0186757	0.171376
Altenerding 92	0.24562	0.248405	0.155304
Altenerding 932	0.160389	0.0106533	0.100574
Altenerding P40	0.0533507	0.179024	0.0372564
Altenerding P42	0.0452582	0.0245285	0.0284664
Aubing 340	0.305271	0.0760524	0.00816669
Aubing 581	0.581732	0.0423376	0.408793
Aubing 82	0.268185	0.445415	1.9884
Baden-Oos 1876	0.732939	0.699805	0.0998693
Barbing-Irlmauth 33	0.15692	0.228367	0.172009
Barbing-Irlmauth 34	0.166481	0.288155	0.178381
Barbing-Irlmauth 35	0.0114656	0.103213	0.0276991
Barbing-Irlmauth 36	0.0559343	0.365395	0.115229
Bargen 4	0.0712687	0.299178	0.0512189
Basel-Bernerring 25	0.0237586	0.644658	0.0886516
Basel-Bernerring 3	0.00471008	0.443883	0.0371491
Basel-Bernerring 30	0.0883386	0.240956	0.123516
Basel-Bernerring 5	0.186507	0.704864	0.279428
Basel-Bernerring 9	0.193695	0.666883	0.304952
Basel-Gotterbarmweg 19	1.67327	1.60391	0.226233
Basel-Gotterbarmweg 32	0.173302	0.0909751	0.00402193
Basel-Gotterbarmweg 34	0.660437	0.459511	0.0419331
Basel-Kleinhüningen 105	0.235248	0.198796	0.0232641
Basel-Kleinhüningen 195	0.108524	0.130134	0.1037
Basel-Kleinhüningen 212A	1.33096	1.37847	0.209614
Basel-Kleinhüningen 63	2.05048	1.8194	0.244357
Basel-Kleinhüningen 67	0.145309	0.0775324	0.00451837
Bissingen 10	0.252717	0.430328	1.96859
Bittenbrunn 13	0.248002	0.1533	0.161664
Bittenbrunn 16	0.0640251	0.126376	0.0736033
Bittenbrunn 19	0.243715	0.0632019	0.000845607
Bittenbrunn 25	0.1409	0.281343	0.116484
Bittenbrunn 29	0.144985	0.067547	0.0582942
Bittenbrunn 41	0.119927	0.251045	0.144946
Blumenfeld 1885	0.858963	0.68831	0.0784703
Bopfingen 1	0.106459	0.500231	0.184741
Bülach 32	0.0690358	0.168897	0.0931824
Donzdorf 36	0.448092	0.0799436	0.0767124
Donzdorf 48	0.539187	0.0369047	0.305299
Donzdorf 65	0.494008	0.0483317	0.247867
Donzdorf 66	0.586325	0.0103542	0.486547
Donzdorf 75	0.692592	0.0594172	0.443465
Donzdorf 80	0.521005	0.0155669	0.195659
Eberfingen 4	0.182914	0.127091	0.13337
Eberfingen 5	0.0691068	0.0122097	0.0286468
Eberfingen 6	0.101047	0.057608	0.067143
Eberfingen 7	0.240017	0.169751	0.170257
Egling 1924	0.491315	0.465328	1.20342
Eichstetten 127	0.150302	0.000551924	0.133113
Eichstetten 134	0.182382	0.000700044	0.160489
Eichstetten 169	0.556958	0.0335018	0.463331
Eichstetten 179	0.383862	0.015578	0.253145
Eichstetten 185	0.192743	0.000154176	0.147751
Eichstetten 201	0.2707	0.000290866	0.238578
Eichstetten 207	0.185938	0.00835724	0.165263
Eichstetten 214	0.243856	0.0148755	0.16047
Eichstetten 215	0.370447	0.0063092	0.261449
Eichstetten 219	0.161695	0.000141224	0.129241
Eichstetten 220	0.500977	0.043028	0.41235
Eichstetten 266	0.45011	0.00803465	0.301662
Eichstetten 268	0.0486707	0.0153068	0.031505
Eichstetten 272	0.1845	6.23941e-07	0.173586
Eichstetten 46	0.46811	0.0302582	0.350197
Eichstetten 91	0.27189	3.28411e-05	0.23232
Eltville 111	0.685113	1.15389	5.1043
Eltville 546	0.582017	0.963757	4.30379
Eltville 7	0.196547	0.0687288	0.0277127
Enns	0.507865	0.849812	3.82486
Entringen 1904	0.521284	0.492987	0.0711485
Entringen 1927	1.57377	1.8552	0.328463
Eschborn 11	0.195422	0.116075	0.00827818
Eschborn 9	0.16095	0.0365846	2.35072e-05
Esslingen-Sirnau 5	0.0550298	0.141786	0.0558821
Fellbach-Schmiden 14	0.091497	0.204076	0.106719
Fellbach-Schmiden 5	0.0131941	0.615888	0.0558708
Fellbach-Schmiden 7	0.0549663	0.126244	0.0579698
Fridingen/Donau 136	0.0831142	0.118536	0.0707667
Fridingen/Donau 24	0.113485	0.00467731	0.00465856
Fridingen/Donau 244	0.0661285	0.220747	0.0530256
Fridingen/Donau 257	0.363733	0.01132	0.0791846
Fridingen/Donau 259	0.479053	0.342726	0.0385842
Fridingen/Donau 52	0.000712953	0.274077	0.0164266
Fridingen/Donau 11	0.414785	0.0849218	0.0930033
Fristingen 5	0.42095	0.0266828	0.0363839
Geiselhöring 2/1904	0.599959	0.834918	3.19666
Giengen 10	0.352031	0.0745815	0.0310644
Giengen 2	0.118552	0.0137962	0.0727747
Giengen 26	1.01895	0.0644653	0.702695
Giengen 29	0.298838	0.00122976	0.3005
Giengen 32	0.218864	0.0019603	0.25786
Giengen 35	0.17137	0.0189222	0.113267
Giengen 9	0.23757	0.0314378	0.106973
Groß-Umstadt 1951	1.01589	1.37888	0.286536
Gültlingen 1889	1.52266	1.25246	0.154717
Gültlingen 1901	2.43644	2.84768	0.496698
Hailfingen 227	0.125746	0.00916279	0.0173695
Hailfingen 269	0.0967915	0.1723	0.103146
Hailfingen 411	0.158268	0.0723451	0.0532931
Hailfingen 424	0.0176774	0.711483	0.0844511
Hailfingen 447	0.00411323	0.31185	0.0241788
Hammelburg 1895	0.653909	0.794593	0.148106
Heidelberg-Kirchheim, Heuau 138	0.0160314	0.446815	0.00164584
Heidelberg-Kirchheim, Heuau 83	0.0050963	0.383401	0.000107074
Heidenheim-Großkuchen, Gassenäcker 17	0.103623	0.0002207	0.0130162
Heidenheim-Großkuchen, Gassenäcker 21	0.46508	0.372568	0.0480953
Heidenheim-Großkuchen, Pfaffensteig 6	0.0260834	0.476865	0.0858925
Heilbronn-Böckingen, Klammenäcker	0.306506	0.304667	0.0462922
Heilbronn-Horkheim 39	0.00450207	0.572421	0.0448516
Hemmingen 15	0.145309	0.0775324	0.00451837
Hemmingen 2	2.14979	1.80614	0.201332
Hemmingen 21	2.29395	3.41148	0.768563
Hemmingen 25	1.5053	1.74912	0.325886
Hemmingen 29	0.903725	0.817313	0.106378
Hemmingen 32	0.441357	0.311947	0.0374836
Herbolzheim 11	0.12573	0.704218	0.278035
Herbolzheim 19	0.12207	0.112234	0.078666
Hintschingen 14	0.739846	0.0720658	0.458809
Hockenheim 2	1.17469	2.12788	0.57983
Hockenheim 22	0.0053147	0.491554	0.0429105
Horb-Altheim 31	0.0942634	0.0199919	0.0418945
Horb-Altheim 37	0.363927	0.0427617	0.00172894
Horb-Altheim 52	1.6426	1.50946	0.212692
Horb-Altheim 60	0.530507	0.0181269	0.012179
Horb-Altheim 66	0.151835	0.0273166	0.000202322
Kahl/Main 213	0.997742	1.07707	0.210577
Kelheim 42	0.0464071	0.233862	0.0868303
Kirchheim/Ries 226	0.190109	0.00777907	0.100364
Kirchheim/Ries 118	0.297317	0.0031766	0.183136
Kirchheim/Ries 168	0.268185	0.445415	1.9884
Kirchheim/Ries 190	0.511438	0.629117	2.19921
Kirchheim/Ries 3	0.268185	0.445415	1.9884
Kirchheim/Ries 324	0.532692	0.477185	1.30806
Kirchheim/Ries 363	0.0294216	0.21075	0.01994
Kirchheim/Ries 389	6.8141e-05	0.266612	0.00549133
Kirchheim/Ries 39	0.899945	1.37462	5.66846
Kirchheim/Ries 411	0.0153537	0.37308	0.00386966
Kirchheim/Ries 414	0.101489	0.324638	0.0915702
Kirchheim/Ries 42	0.385765	0.393072	1.13026
Kirchheim/Ries 50	0.961216	1.54105	6.70424
Kirchheim/Ries 54	0.68663	0.864653	2.94413
Kirchheim/Ries 74	0.752758	0.935328	3.14152
Kirchheim/Teck 134	0.0282135	0.456134	0.0912238
Klengen 10	0.176293	0.150353	0.0970819
Klepsau 13	0.0291973	0.474034	0.0820864
Klepsau 24	0.0387653	0.407833	0.0937139
Klepsau 51	0.00934032	0.536003	0.0681718
Klepsau 6	0.0049306	0.903473	0.0516988
Klepsau 8	0.000675555	0.258217	0.0132238
Klepsau 9	0.0131769	0.88627	0.0898093
Lampertheim-Hofheim 1	0.0780835	0.0407198	0.0497596
Lampertheim-Hofheim 3	0.0710466	0.0794219	0.06724
Lenting 1955	0.31918	0.133576	0.00403521
Mainz-Bretzenheim	0.129999	0.0948573	0.0925348
Mainz-Greiffenklaustraße 1	0.523251	0.814888	0.191688
Mainz-Kostheim	0.882948	1.39847	0.333626
Marktoberdorf 131	0.258737	0.00596153	0.100201
Marktoberdorf 141	0.505148	0.0660405	0.1064
Marktoberdorf 183	0.941426	0.10201	0.804282
Marktoberdorf 187	0.180178	0.0603745	0.188436
Marktoberdorf 190	0.0722252	0.00303054	0.0554055
Marktoberdorf 191	0.308262	0.0148516	0.262065
Marktoberdorf 196	0.387935	0.0639086	0.0782722
Marktoberdorf 197	0.635585	0.0744944	0.378531
Marktoberdorf 20	0.115913	0.0028107	0.0664222
Marktoberdorf 209	0.378651	0.0615459	0.0915963
Marktoberdorf 214	0.622552	0.0666635	0.357372
Marktoberdorf 22	0.360426	0.0275979	0.291591
Marktoberdorf 221	0.369775	0.477564	1.69456
Marktoberdorf 34	0.306509	0.00690984	0.29904
Marktoberdorf 66	0.115047	0.0346523	0.119636
Marktoberdorf 67	0.00455561	0.264401	8.52972e-07
Marktoberdorf 69	0.089194	0.19358	0.0906384
Marktoberdorf 85	5.11196e-05	0.260245	0.0119914
Marktoberdorf 97	0.467618	0.00340332	0.386259
Mauern 1(1902)	0.776803	1.30903	5.83098
Mengen 23	0.103902	0.10683	0.0883429
Mengen 30	0.159051	0.0310873	0.0436403
Mengen 40	0.261468	0.0228179	0.00190477
Mindelheim 54	0.00233058	0.340925	0.0281878
Möhringen 3	0.944406	1.22002	0.228116
Nassenfels 5	0.252717	0.430328	1.96859
Neresheim 45	0.705657	0.633396	0.0782755
Niedernberg 19	0.000297105	0.416933	0.0160559
Niedernberg 7	0.0370168	0.316366	0.0192195
Niederstotzingen 12a	0.000208994	0.194361	0.00225377
Niederstotzingen 9	0.000129499	0.353638	0.00612418
Opfingen 91/1	0.318622	0.0676553	3.02764e-05
Pleidelsheim 1/1964	0.994256	1.12615	0.199491
Pleidelsheim 102	0.242785	0.49433	0.278385
Pleidelsheim 103	0.368017	0.35612	0.0555914
Pleidelsheim 104	0.378532	0.00256304	0.0811853
Pleidelsheim 111	0.0452582	0.0245285	0.0284664
Pleidelsheim 113	0.0950872	0.0503709	0.0640422
Pleidelsheim 116	0.254444	0.0534516	0.0712681
Pleidelsheim 120	0.0671206	0.0926065	0.0639345
Pleidelsheim 125	0.124015	0.994708	0.320523
Pleidelsheim 127	0.0337487	0.159549	0.0615242
Pleidelsheim 13	0.0110378	0.125545	0.0317953
Pleidelsheim 14	0.423047	0.209557	0.00813441
Pleidelsheim 15	0.100922	0.442834	0.165528
Pleidelsheim 231	0.0162986	0.253203	0.0534039
Pleidelsheim 232	0.00424919	0.506675	0.0455093
Pleidelsheim 244	0.0152019	0.262755	0.0515269
Pleidelsheim 27	0.772248	0.15551	0.0106379
Pleidelsheim 40	0.631985	0.213182	0.371133
Pleidelsheim 42	1.03805	0.786868	0.0887198
Pleidelsheim 44	0.0365299	0.107266	0.0498962
Pleidelsheim 46	0.128963	0.216259	0.161518
Pleidelsheim 60	0.0677205	0.210671	0.100911
Pleidelsheim 64	0.0564053	0.125252	0.0443929
Pleidelsheim 68	0.0134341	0.453558	0.0652252
Pleidelsheim 71	2.80887	2.30011	0.283275
Pleidelsheim 74	0.406368	0.104408	0.00326714
Pleidelsheim 76	0.0377154	0.425194	0.108906
Pleidelsheim 78	0.0957512	0.0729041	0.0999328
Pleidelsheim 83	0.288597	0.0522785	0.00238326
Pleidelsheim 91	0.376143	0.293533	0.0296968
Pleidelsheim 95	0.109461	0.526282	0.168944
Pliening 151	0.268124	0.0159489	0.00625463
Schleitheim-Hebsack 119	0.197	0.0108771	0.0450975
Schretzheim 127	0.00485671	0.61736	0.00589201
Schretzheim 155	0.184909	0.031506	0.194679
Schretzheim 214	0.00976163	0.170737	0.03621
Schretzheim 215	0.0305783	0.37605	0.0875411
Schretzheim 245	0.0533791	0.0965851	0.0569911
Schretzheim 246	0.0432808	0.143335	0.0657844
Schretzheim 25	0.00461517	0.189331	0.0314619
Schretzheim 274	0.372386	0.0202875	0.277088
Schretzheim 3	0.33669	0.00264644	0.284374
Schretzheim 301	0.000494569	0.183206	0.00739577
Schretzheim 324	0.220102	0.00895113	0.176585
Schretzheim 345	0.608137	0.0757323	0.465905
Schretzheim 370	0.0277003	0.154341	0.0497922
Schretzheim 371	0.0281956	0.250019	0.0701725
Schretzheim 378	0.612911	0.0549846	0.6517
Schretzheim 391	0.0373457	0.176495	0.0617811
Schretzheim 394	0.801805	0.0135715	0.680389
Schretzheim 41	0.000181182	0.461699	0.0144989
Schretzheim 414	0.370619	0.0382124	0.244306
Schretzheim 482	0.00480547	0.284367	2.37697e-05
Schretzheim 486	0.029722	0.274551	0.0755208
Schretzheim 535	0.204236	0.00471646	0.219892
Schretzheim 556	0.108287	0.13985	0.110993
Schretzheim 580	0.0335288	0.475931	0.0214551
Schretzheim 613	0.423572	0.101725	0.00614457
Schretzheim 616	0.2169	0.0295801	0.0943605
Schretzheim 621	0.118552	0.0137962	0.0727747
Schretzheim 622	0.628028	0.0618818	0.373489
Schretzheim 623	0.298808	0.0318358	0.21613
Schretzheim 630	0.52003	0.0483128	0.281634
Schretzheim 74	0.0358689	0.410988	0.0785403
Schwanfeld	0.013359	0.668433	0.066264
Sontheim/Brenz 11	0.0162986	0.253203	0.0534039
Sontheim/Brenz 72	0.00574187	0.378985	0.0304092
Stuttgart-Stammheim 7	0.401497	0.282298	0.0285331
Unterschneidheim 2	0.668554	0.717057	0.118085
Unterthürheim 214	0.102027	0.0572715	0.036687
Viernheim 11	0.00584745	0.291115	1.26024e-06
Wallerstädten 4	0.0531696	0.309672	0.0288376
Weingarten 11	0.358754	0.0878773	0.0274459
Weingarten 12	0.230333	0.0128965	0.178632
Weingarten 132	0.351546	0.0260511	0.275673
Weingarten 136	0.119477	0.000271072	0.0950551
Weingarten 238	0.198449	0.0200589	0.000900018
Weingarten 362	0.717031	0.707722	1.6183
Weingarten 385	0.244406	0.0277887	0.234523
Weingarten 419	0.0691068	0.0122097	0.0286468
Weingarten 423	0.0701717	0.204481	0.088822
Weingarten 478	0.419881	0.034099	0.247709
Weingarten 495A	0.422903	0.0428837	0.208635
Weingarten 510	0.172342	0.0415851	0.0785979
Weingarten 595	0.0370333	0.0125673	0.0383498
Weingarten 61	0.287503	0.00136512	0.233862
Weingarten 616	0.00591939	0.458509	0.000530832
Weingarten 619	0.000130577	0.255118	0.00348966
Weingarten 62	0.499146	0.00926169	0.379134
Weingarten 654	0.0691068	0.0122097	0.0286468
Weingarten 681	0.358418	0.0494387	0.11599
Weingarten 789B	0.276194	0.0301491	0.143543
Wenigumstadt 141	1.93533	3.54653	0.97091
Westheim IX	0.0136445	0.150319	0.034442
Westheim X	0.040426	0.0873678	0.0409019
Wettelsheim 1	0.337247	0.0335328	0.158145
Wiesbaden, Mainz-Kastel	0.0543505	0.262985	0.102675
Wiesbaden-Biebrich	0.299642	0.0298576	0.0648174
Wiesloch 28	0.252717	0.430328	1.96859
Wittislingen 4	0.148715	0.502485	0.2135
Wyhl 22	0.540347	0.499188	0.0691111
Ergolding 244B	0.35012	0.110424	8.41377e-06
